# A role for BMP-induced homeobox gene *MIXL1* in acute myelogenous leukemia and identification of type I BMP receptor as a potential target for therapy

Aaron Raymond<sup>1,2</sup>, Bin Liu<sup>1,3</sup>, Hong Liang<sup>1</sup>, Caimiao Wei<sup>4</sup>, Michele Guindani<sup>4</sup>, Yue Lu<sup>5,6</sup>, Shoudan Liang<sup>7</sup>, Lisa S. St. John<sup>8</sup>, Jeff Mouldrem<sup>8</sup>, Lalitha Nagarajan<sup>1,2,3,5,9,10</sup>

<sup>1</sup>Department of Genetics, the University of Texas MD Anderson Cancer Center, Houston, TX 77030, USA

<sup>2</sup>Graduate Program in Genes and Development, the University of Texas MD Anderson Cancer Center, Houston, TX 77030, USA

<sup>3</sup>Center for Cancer Genetics and Genomics, the University of Texas MD Anderson Cancer Center, Houston, TX 77030, USA

<sup>4</sup>Department of Biostatistics, the University of Texas MD Anderson Cancer Center, Houston, TX 77030, USA

<sup>5</sup>Dept. of Leukemia, the University of Texas MD Anderson Cancer Center, Houston, TX 77030, USA

<sup>6</sup>Dept. of Molecular Carcinogenesis, the University of Texas MD Anderson Cancer Center, Houston, TX 77030, USA

<sup>7</sup>Dept. of Bioinformatics and Computational Biology, the University of Texas MD Anderson Cancer Center, Houston, TX 77030, USA

<sup>8</sup>Section of Transplantation Immunology, Department of Stem Cell Transplantation and Cellular Therapy, the University of Texas MD Anderson Cancer Center, Houston, TX 77030, USA

<sup>9</sup>Graduate Program in Human Molecular Genetics, the University of Texas MD Anderson Cancer Center, Houston, TX 77030, USA

<sup>10</sup>Center for Stem cell and Developmental biology, the University of Texas MD Anderson Cancer Center, Houston, TX 77030, USA

## Correspondence to:

Lalitha Nagarajan, e-mail: lnagaraj@mdanderson.org

Received: May 01, 2014

Accepted: October 02, 2014

Published: December 17, 2014

## ABSTRACT

**Mesoderm Inducer in *Xenopus* Like1 (*MIXL1*), a paired-type homeobox transcription factor induced by TGF- $\beta$  family of ligands is required for early embryonic specification of mesoderm and endoderm. Retrovirally transduced *Mixl1* is reported to induce acute myelogenous leukemia (AML) with a high penetrance. But the mechanistic underpinnings of *MIXL1* mediated leukemogenesis are unknown. Here, we establish the protooncogene *c-REL* to be a transcriptional target of *MIXL1* by genome wide chromatin immune precipitation. Accordingly, expression of *c-REL* and its downstream targets *BCL2L1* and *BCL2A2* are elevated in *MIXL1* expressing cells. Notably, *MIXL1* regulates *c-REL* through a zinc finger binding motif, potentially by a *MIXL1*-Zinc finger protein transcriptional complex. Furthermore, *MIXL1* expression is detected in the cancer genome atlas (TCGA) AML samples in a pattern mutually exclusive from that of *HOXA9*, *CDX2* and *HLX* suggesting the existence of a core, yet distinct HOX transcriptional program. Finally, we demonstrate *MIXL1* to be induced by BMP4 and not TGF- $\beta$  in primary human hematopoietic stem and progenitor cells. Consequently, *MIXL1* expressing AML cells are preferentially sensitive to the BMPRI kinase inhibitor LDN-193189. These findings support the existence of a novel *MIXL1*-*c-REL* mediated survival axis in AML that can be targeted by BMPRI inhibitors. (*MIXL1*-human gene, *Mixl1*- mouse ortholog, *MIXL1*- protein)**

## INTRODUCTION

Acute myelogenous leukemia (AML), the most common leukemia in adults, is clinically and genetically diverse [1]. Overall prognosis of AML remains dismal

despite the incremental progress in defining subsets responsive to aggressive chemotherapy [2]. Recent high-throughput genome sequencing efforts have identified several somatic mutations some recurrent and some unique to individual leukemia, uncovering the vast

genetic heterogeneity in AML [3–9]. Even as valuable clues emerge from the mutational landscape, challenges remain in discerning therapeutic vulnerabilities. Better understanding of differentially expressed regulatory genes may yield clues on novel target identification. In this regard, homeobox genes (HOX), are constitutively expressed in AML in contrast to the temporal regulation in normal hematopoiesis [10–16]. But HOX proteins remain unexplored as therapeutic targets due to the technical limitations in inhibiting transcription factors.

*MIXL1* the human ortholog of *Mix.1*, a paired-type, non-clustered HOX transcription factor originally isolated in *Xenopus laevis* is aberrantly expressed in AML and lymphomas [17, 18]. In normal homeostasis, *MIXL1* expression is restricted to hematopoietic stem and progenitor cells (HSPCs) [17]. Retroviral transduction of *Mix1l* the mouse ortholog, results in transplantable AML in 100% of mice, suggesting a leukemogenic potential for *Mix1l* [19]. Additionally, forced expression of *Mix1l* in hematopoietic stem cells confers abnormal, growth factor-dependent self-renewal potential to granulocytic precursors [20]. Over expression of *Mix1l* in mouse embryonic stem cells promotes mesodermal, hemangioblastic, and hematopoietic progenitors consistent with a role for mesoderm induction [21].

*Mix.1* and orthologs of *Mix.1* are induced by TGF- $\beta$ /BMP family of structurally related secreted molecules [22–24]. In mammals, the TGF- $\beta$ /BMP family comprises of 24 ligands. The transmembrane receptor complex consists of two molecules each of type II and type I receptor. Upon ligand binding, type II receptor phosphorylates type I receptor which in turn phosphorylates SMAD transcription factors. Phosphorylated SMADs regulate target gene expression in the nucleus to elicit a growth or differentiation response. Given the functional overlap and redundancy between the ligands [25], it is likely that *Mix1l* may be induced by different ligands in a cell type specific manner. Thus in mouse ES cells TGF- $\beta$  stimulation results in SMAD 2 and 3 binding to *Mix1l* promoter [26]. In hematopoiesis, TGF- $\beta$  confers quiescence to hematopoietic stem cells (HSCs) raising the possibility that *MIXL1* may not be TGF- $\beta$  inducible in HSCs [27].

The present study was aimed at determining factors upstream and downstream of *MIXL1* in hematopoiesis and the potential role of *MIXL1* in AML pathogenesis. We identified several transcriptional targets of *MIXL1* in myeloid leukemic lines using genome wide chromatin immunoprecipitation. We establish the proto-oncogene *c-REL* to be an important *MIXL1* transcriptional target that confers an anti apoptotic advantage to *MIXL1* expressing cells. Upstream of *MIXL1*, BMP4 induces *MIXL1* in HSPCs. Consistent with the BMP mediated induction, AML cells that express *MIXL1* are preferentially sensitive to type I BMP/activin receptor kinase inhibition. Together, these

results indicate for the first time a novel survival mechanism conferred by *BMP-MIXL1-c-REL* axis in AML which can be targeted by type I BMP receptor kinase inhibitors.

## RESULTS

### Generation of *MIXL1*-expressing AML cell lines

*MIXL1* expression is varied in AML cell lines. KG1, ML3, and K562 express abundant *MIXL1*, whereas HL60 and U937 do not [17]. The lack of *MIXL1* expression in U937 cells allowed us to generate isogenic cell lines with *MIXL1* expression as ectopic expression of transcription factors in these cells has been valuable in elucidation of target genes and pathways for *SET-CAN*, *MLL*, *MNI* [28–30]. Therefore, we established two clonal lines (1MIXL1 and 2MIXL1) expressing HA-FLAG epitope tagged *MIXL1* and a control vector-transduced clone in U937 cells. As shown in Figure 1A, *MIXL1* expression levels in the clonal lines were similar to endogenous *MIXL1* levels in K562, KG1, ML3, and OCI-AML2 cells. There were no significant differences in doubling time as measured by conventional MTS assay or clonogenicity in methyl cellulose between the control cells and the 1MIXL1 and 2MIXL1 cells. However, response to the alkylating agent doxorubicin differed significantly between the control and *MIXL1* expressing cells (Fig. 1B). After 24 hours of treatment, doxorubicin had an LD<sub>50</sub> of 0.25  $\mu$ M for the control line and 0.75  $\mu$ M for 1MIXL and 2MIXL. At 1.75  $\mu$ M, doxorubicin was cytotoxic to 100% of control cells, whereas 30% of the *MIXL1*-expressing clones appear to survive. These results suggested that *MIXL1* expression confers a survival advantage, potentially through an anti apoptotic pathway. Importantly, such a subtle yet functional response supported the use of these clonal lines for further characterization of downstream transcriptional targets.

### *c-REL*, a direct transcriptional target of *MIXL1*

By taking advantage of the Flag epitope tag and the characterization of two distinct isogenic lines (1MIXL and 2MIXL), we performed a rigorous, high-throughput chromatin immunoprecipitation coupled sequencing (ChIP-Seq) analysis. *MIXL1*-bound DNA fragments were immunoprecipitated from each clonal line using monoclonal antibodies against Flag epitope. For controls, two separate immunoprecipitations were performed in the U937 vector-transduced cells using (i) FLAG antibodies and (ii) mouse immunoglobulin G (IgG). The sequenced DNA fragments were aligned to the human genome and analyzed in different combinations: 1MIXL-Flag normalized to control-Flag and control-IgG, 2MIXL-Flag normalized to control-Flag and control-IgG, and 1MIXL-Flag and 2MIXL-Flag combined and then normalized to control-Flag and control-IgG.

A

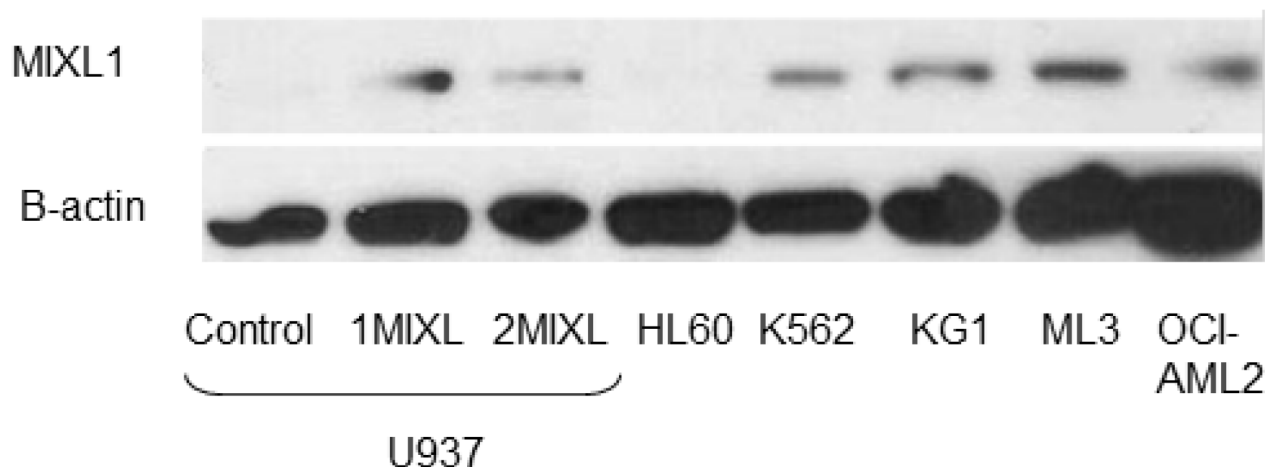

B

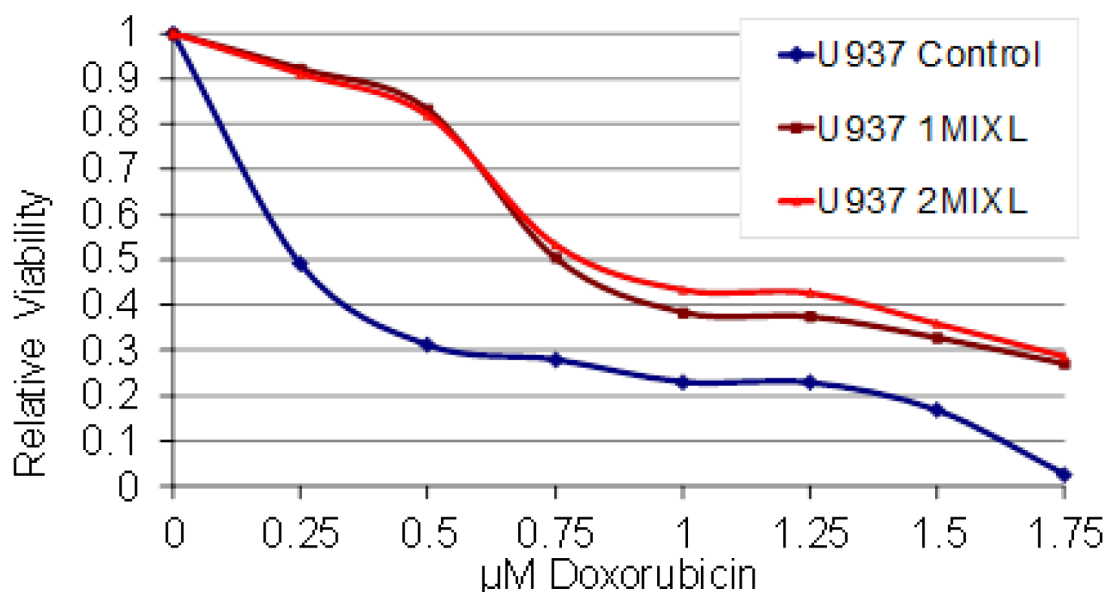

**Figure 1: *MIXL1* expression confers decreased sensitivity to doxorubicin in AML cells.** (A) Stable transfectants of U937 cells express MIXL1 at levels similar to those of endogenous MIXL1 in AML cell lines. MIXL1 was detected by probing 30  $\mu\text{g}$  of whole cell lysates resolved on SDS-PAGE and transferred to PVDF membrane, with rabbit antibodies against N-terminal epitope of MIXL1 and with  $\beta$ -actin for a loading control [17]. (B) MIXL1 expression reduces sensitivity of U937 cells to doxorubicin. The cell lines were treated with 0–1.75  $\mu\text{M}$  doxorubicin on day 0. Cell survival was measured at 24 hours by MTS assay as detailed in Materials and Methods. Absorbance of untreated cells was normalized to 1. Relative viability at varying concentrations of doxorubicin is denoted.

A total of 179 peaks shared by the three groups were examined in further studies (Fig. 2A and Supp. Table S1).

When each of the 179 peaks was localized to its nearest gene locus, 64% of the peaks mapped to

gene promoter regions (within 5 kbp upstream of the transcription start site), 8% localized to transcribed regions, 4% were 5–25 kbp upstream of transcription start sites, 1% were within 5 kbp of the 3' transcription

end, and 3% were further downstream, 5–25 kbp from the polyadenylation signal (Fig. 2B). Interestingly, 20% of the peaks (denoted as “distant” in Fig. 2B) were classified as farther than 25 kbp from known genes. To further confirm the global ChIP results, we tested five of the target loci

identified (*EIF1*, *c-REL*, *SLC39A13*, *SMYD5*, and *ZP3*) by direct ChIP with Flag-antibody on the three cell lines. (Fig. 2C). All five loci showed specific enrichment, in contrast to the vector transduced U937 cells, confirming the global ChIP-Seq findings.

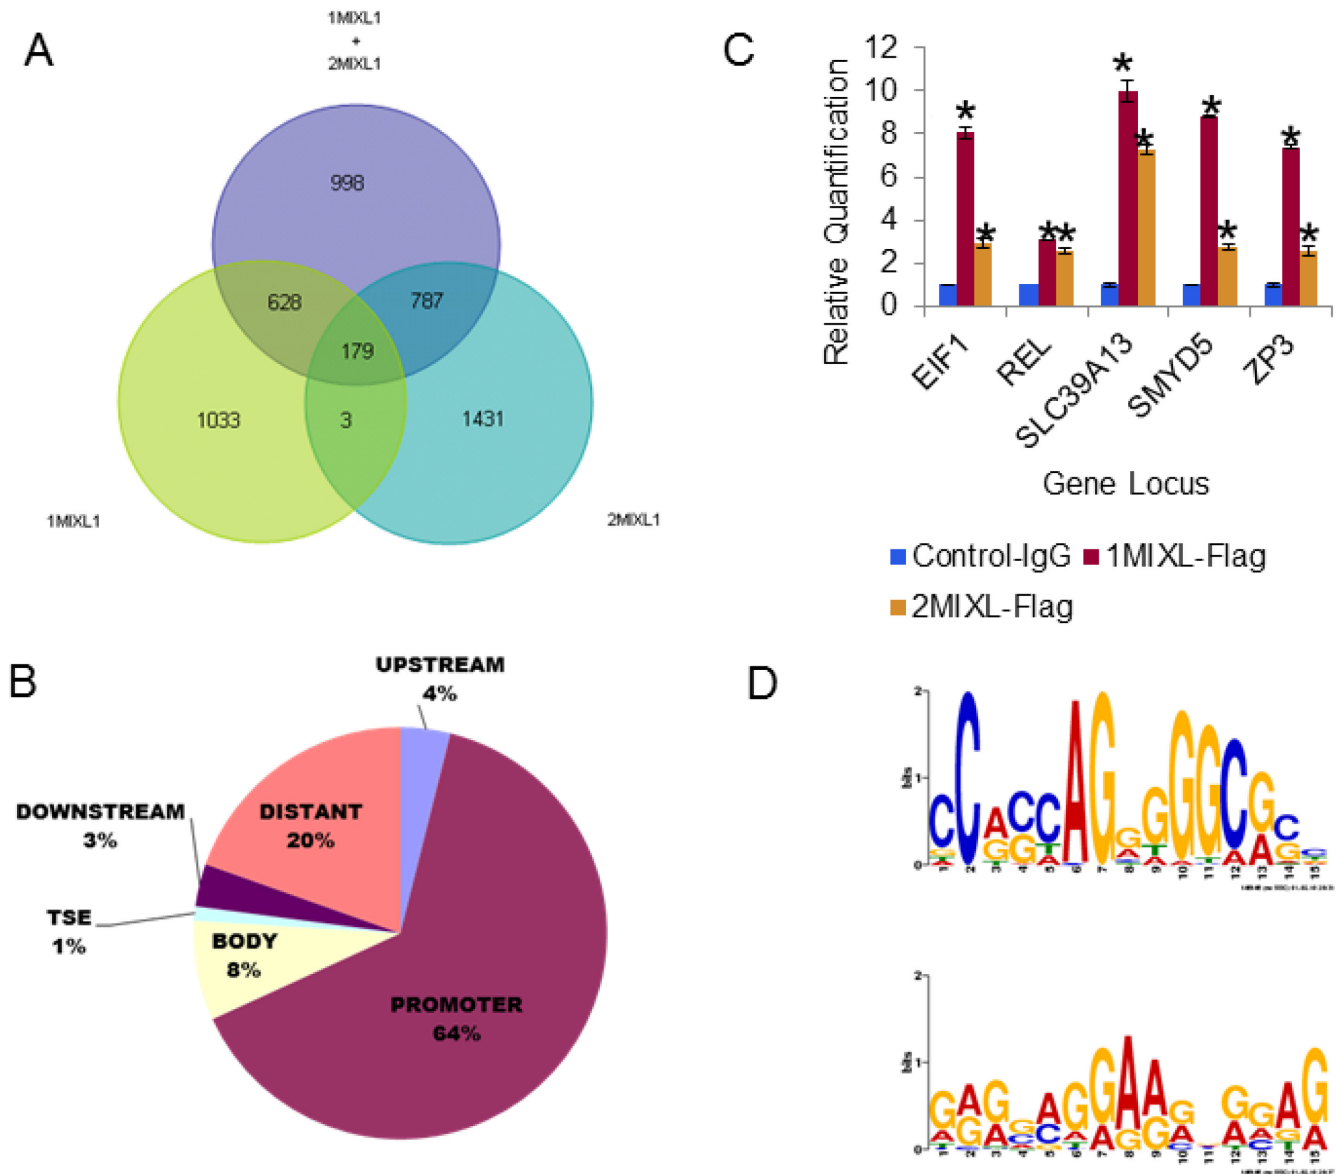

**Figure 2: Identification of direct MIXL1 transcriptional targets by ChIP-Sequencing.** (A) Venn diagram 1MIXL-Flag normalized to control-Flag and control-IgG (Set 1), 2MIXL-Flag normalized to control-Flag and control-IgG (Set 2), and 1MIXL-Flag and 2MIXL-Flag combined and normalized to control-Flag and control-IgG (Set 3). A total of 179 peaks shared by the three groups is denoted. (B) Pie chart depicting localization of MIXL1 in the human genome. Peaks were classified according to distance from the nearest transcribed gene using the following criteria: upstream was 5–25 kbp 5' of the transcription start site, promoter was 0–5 kbp upstream of the transcription start site, body was between the transcription start site and end, TSE was 0–5 kbp downstream of the transcriptional end, downstream was 5–25 kbp downstream of the transcriptional end, and distant peaks were those not allocated to a gene. Note that the majority of peaks (64%) localized to gene promoters. (C) ChIP of five candidate peaks identified by ChIP-Seq. FLAG antibodies were used and ChIP-Seq (*EIF1*, *c-REL*, *SLC39A13*, *SMYD5*, and *ZP3*) showed specific MIXL1 binding to both 1MIXL and 2MIXL clones by ChIP normal mouse IgG served as control. Error bars represent standard deviation between triplicates. (D) The most common motif in the ChIP-seq peaks are Zinc-Finger binding sites. Motif1 and Motif2 were the two most statistically significant generated using the Multiple EM for Motif Elicitation [MEME] against the peak regions identified in the ChIP-seq analysis. Both motifs are C/G-heavy regions with similarity to known zinc finger motifs.

MIXL1 binding loci were functionally annotated using the gene ontology and tissue expression analyses with the software DAVID (The Database for Annotation, Visualization and Integrated Discovery version 6.7) [31–33]. As anticipated for a homeobox transcription factor MIXL1 occupied genes were involved in broad categories of cellular processes, translation factor activity, nucleic acid binding, organelle, cell part, cell and organelle part functions (Table I and Supp. Table S2). The most significant was the cellular processes class ( $P$  value =  $9.59E-04$ ). Of note, was a tenfold enrichment for factors regulating translation including *EIF1* (NM\_005801) confirmed by direct examination (Fig. 2C).

Based on the structure of homeodomain MIXL1 was predicted to bind a 11 bp motif cooperatively as a dimer [34, 35]. Consistent with this prediction, TAAT motif with a 3 bp spacer i.e TAATTARATTA, was identified by *in vitro* size selection and confirmed to regulate expression of *Gsc* [36]. Likewise, *Flkl1*, and *Pdgfra* were identified to be activated by a similar motif in mouse embryonic stem cells [37]. To determine whether this motif was enriched in the set of 179 peaks (Supp. Table S1), we analyzed two variants of the motif and a comparable randomized sequence using the Motif Alignment and Search Tool (MAST) (Supp. Fig. S1). Surprisingly, neither motif was more frequent in the 179-peak set than the random sequence. We next performed Multiple Expectation Maximization for Motif Elicitation (MEME) [38] for the sequences within 200 bp of each peak summit. As shown in Fig. 2D, the two highest peaks were:

NC(A/G)(C/G)(C/T/A)AG(G/A)(G/T/A)(G/A)  
(G/T)(C/A)(G/A)(C/G)(C/T) (width = 15 nucleotides, sites = 65, E-value =  $1.1^{-027}$ ) and (G/A/T)(A/G/C)(G/A)  
(G/C/A)(A/C/G)(G/A/T)(G/A)(A/G)(A/G)(G/A/C)  
N(G/A)(G/A/C)(A/G/T)(G/A) (width = 15 nucleotides, sites = 112, E-value =  $3.6^{-015}$ ). Interestingly, both these sites harbored a potential zinc finger binding motif consensus. Thus, in the U937 myelomonocytic leukemia system, MIXL1 appears to regulate transcription through either a novel motif or interaction with another DNA-binding protein.

To further characterize direct transcriptional targets of MIXL1, we performed whole-genome expression

analysis using the control and 1MIXL lines on an Affymetrix HG-133 Plus 2.0 microarray (Supp. Table S3). A few differentially expressed genes (*APBB2*, *EGR1*, *IL18R1*, *PCGF2*, and *c-REL*) were validated by reverse transcription coupled quantitative polymerase chain reaction (qPCR) to confirm the global expression profiling results (Fig. 3A). When the ChIP-Seq results were integrated with the global expression profiling results, 82 of the 179 genes identified by ChIP-Seq were either up regulated or down regulated. Sixty-seven of these 82 MIXL1-binding genes were in gene promoters, four were upstream of transcription start sites, nine were in the gene body, and two were downstream of the 3' transcription end (Supp. Table S4 and S5). Among the genes with expression alterations, the proto-oncogene *c-REL*, cellular homolog of the chicken retroviral oncogene *v-rel* (for reticuloendotheliosis) and a member of the NF- $\kappa$ B family, was of particular interest because of its established role in inducing anti apoptotic genes and the observed decrease in drug sensitivity in MIXL1 expressing clones shown in Fig. 1B [39]. To confirm that endogenous MIXL1 regulated *c-REL* expression, the AML cell line KG1 was tested for occupancy with antibodies against different epitopes (amino and carboxy terminals) on the MIXL1 protein. Fig. 3B confirms localization of MIXL1 to endogenous *c-REL* promoter in KG1 cells. Next, we evaluated the expression of *c-REL* and its transcriptional targets *BCL2A1* and *BCL2L1* (Fig. 3C). As anticipated, KG1 cells expressed *c-REL*, *BCL2A1* and *BCL2L1* transcripts. To determine whether genetic ablation of *MIXL1* affected the expression of its downstream targets, we used two distinct short hairpin RNA (shRNA) lentiviral vectors. *MIXL1* expression was decreased under the knockdown conditions with the two shRNAs but not with the scrambled control (Fig. 3C). Expression of *c-REL*, *BCL2A1*, and *BCL2L1* were all lower under conditions of *MIXL1* knockdown. Forced expression of *c-REL* in *MIXL1* shRNA-expressing cells rescued *BCL2A1* and *BCL2L1* expression, confirming these genes to be transcriptional targets of *c-REL*. We next examined how genetic ablation of endogenous *MIXL1* affected the growth kinetics of KG1 cells (Fig. 3D). While the control shRNA-transfected cells

**Table 1: Gene Ontology of MIXL1 Peaks Identified by ChIP Seq**

| GO         | Term                                              | Count | P Value  | Fold Enrichment | Benjamini |
|------------|---------------------------------------------------|-------|----------|-----------------|-----------|
| GO:0009987 | cellular process                                  | 66    | 9.59E-04 | 1.21            | 0.016     |
| GO:0008135 | translation factor activity, nucleic acid binding | 5     | 0.0013   | 10.36           | 0.037     |
| GO:0043226 | organelle                                         | 57    | 0.0039   | 1.278           | 0.042     |
| GO:0044464 | cell part                                         | 79    | 0.0040   | 1.07            | 0.022     |
| GO:0005623 | cell                                              | 79    | 0.0041   | 1.07            | 0.015     |
| GO:0044422 | organelle part                                    | 31    | 0.0154   | 1.47            | 0.042     |

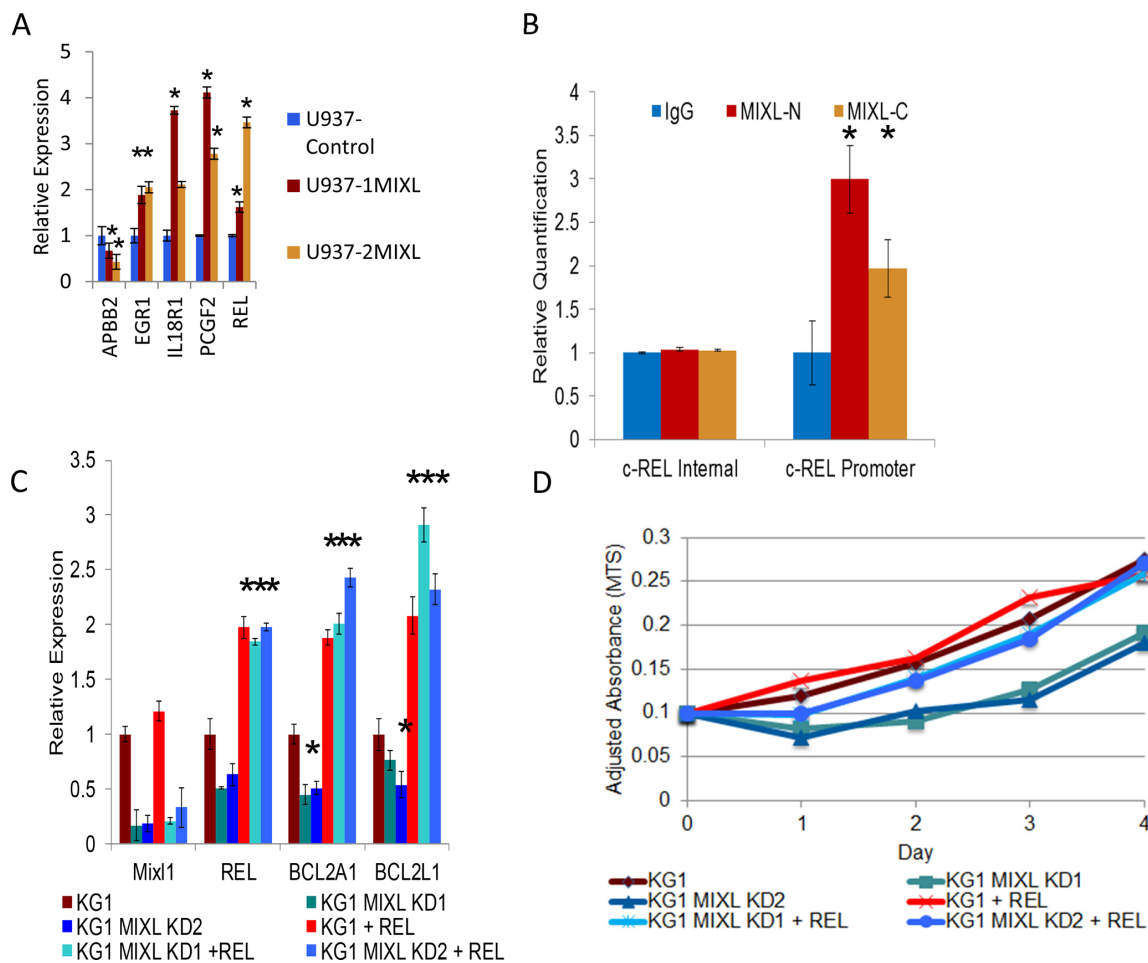

**Figure 3: *MIXL1* up regulates *c-REL* expression to enhance anti apoptotic gene transcription. (A)** *MIXL1*-expressing clones show enhanced transcript levels for *c-REL*, *BCL2A1*, and *BCL2L1*. Quantitative RT-PCR results show the differences in *c-REL*, *BCL2A1*, and *BCL2L1* expression levels between the U937 control, 1MIXL, and 2MIXL cells. Expression was normalized to 18S rRNA transcript levels. Error bars represent standard deviation between triplicates. \* $p < 0.05$ . **(B)** ChIP localizes endogenous *MIXL1* to *c-REL* promoter in KG1 cells. Quantitative genomic PCR analysis shows specific enrichment of endogenous *MIXL1* immunoprecipitated with either N-terminal or C-terminal *MIXL1* antibodies on the *c-REL* promoter whereas an internal locus within the *c-REL* gene showed no *MIXL1* occupancy. Error bars represent standard deviation between triplicates. **(C)** Knockdown of *MIXL1* decreased while enforced expression of *c-REL* increased *c-REL*, *BCL2A1*, and *BCL2L1* transcript levels. *MIXL1* shRNA lentivirus and *c-REL* retrovirus were transduced into KG1 cells. RT-qPCR was performed in triplicate on RNAs isolated 48 hours after transduction. Expression was normalized to 18S rRNA levels, and error bars represent standard deviation between triplicates. **(D)** *c-REL* over-expression rescues *MIXL1* knockdown-mediated growth arrest in KG1 cells. Growth was measured by MTS assay every 24 hours over a 4-day period in KG1 cells transduced with *MIXL1* shRNA lentivirus and *c-REL* retrovirus. Absorbance was normalized to that of a non-transfected control sample. \* $p < 0.05$ .

grew exponentially over 4 days as anticipated, the cells with *MIXL1* knockdown showed a diminished doubling time for the first 48 hours. Enforced expression of *c-REL* rescued the retarded growth establishing that loss of *c-REL* expression in the absence of *MIXL1* mediated the diminished growth rate. These results demonstrate *c-REL* to be a direct transcriptional target of *MIXL1* in AML cells.

To further define the promoter elements ChIP peak in the *c-REL* promoter was examined by luciferase reporter assays with nested fragments (Fig. 4A). The reporter constructs were co-transfected with a *MIXL1* expression construct, a HOX-less *MIXL1* expression vector, or an empty vector in HEK293T cells and assayed

for luciferase activity. Of these, only the 700-bp and 944-bp promoters were significantly induced by full-length *MIXL1* (Fig. 4B). To narrow down the region further, the 5' part of the 700-bp region was reduced to progressively shorter fragments (Fig. 4A). Among these, only the 550-bp promoter segment was significantly induced by full-length *MIXL1* (Fig. 4B).

A search of the 550-bp region for known transcription factor binding motifs identified two NF- $\kappa$ B motifs, a RUNX1 motif, two Sp1 motifs, and four MZF1 motifs (Supp. Fig. S2). MZF1 is a zinc finger transcription factor associated with the myeloid lineage [40]. As the consensus motif identified in the global ChIP was a zinc

finger binding motif, qPCR analysis was performed with *c-REL* promoter and control intron primer sets in MZF1-immunoprecipitated 1MIXL cells (Fig. 4C). The promoter region was enriched approximately 2.5-fold in the MZF1-immunoprecipitated fraction, whereas the intronic control region was not. These findings are consistent with *c-REL* promoter activation by MZF1 through direct or indirect interaction with MIXL1 (Fig. 4D).

### Mutually exclusive expression of *MIXL1* and *HOXA9* in primary AML samples

Next we interrogated the significance of *MIXL1* expression in primary human AML. To determine if *MIXL1* expression levels were restricted to specific French American British (FAB) categories of AML, the RNA seq data from TCGA samples were correlated with the 8 FAB subsets. Within each FAB category, the samples were ordered according to the expression levels

of *MIXL1* transcripts (Fig. 5A). *MIXL1* expression was seen in a subset of M0, M1, M2, M4 and M7 samples but excluded from M3 and M6. Furthermore, global expression profiling in the 1MIXL1 clonal U937 cells suggested a decrease in *HOXA* cluster transcripts upon *MIXL1* expression. Although *HOXA9* may not be a direct target of repression, because of the established role of *HOXA9* in AML [41, 42], we examined whether the inverse relationship between *HOXA9* and *MIXL1* was also seen in primary AML samples. The FAB based analyses confirmed mutually exclusive expression of *MIXL1* and *HOXA9* within each FAB subset (Fig. 5A). To further refine the identity of *MIXL1* expressing AML samples, we accessed the RNA-Seq data through c-Bioportal [43] which allowed the threshold to be set at a z-score  $\geq 1$  for expression. Thus we identified samples with greater than one standard deviation above the mean expression value. By this criterion, *MIXL1* was upregulated in 11.8% of cases and amplified and overexpressed in 1.2% of

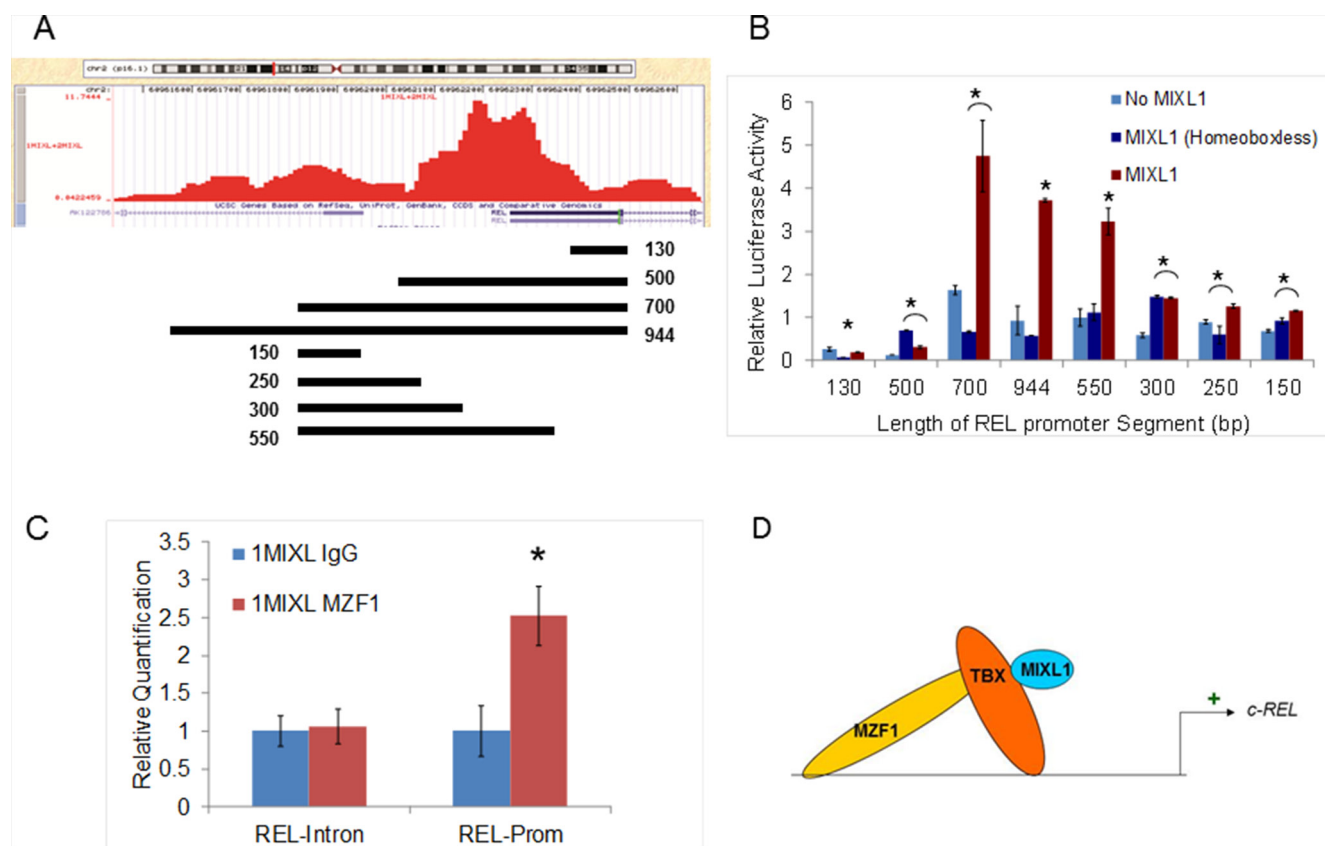

**Figure 4: MIXL1 binds to the *c-REL* promoter.** (A) *c-REL* promoter peak region identified by ChIP-Seq, as generated by the University of California, Santa Cruz, genome browser is shown. The location and size of each promoter fragment used for the luciferase reporter assay is displayed underneath. (B) MIXL1 binds to a 550-bp region within the *c-REL* promoter. Regions of the DNA depicted in 4A were cloned into the reporter vector pBV-Luc luciferase, which were then transiently co-transfected into HEK293T cells with *MIXL1*, *MIXL1 Homeobox-less*, or empty expression vector. Equal amount of *Renilla* luciferase co-transfected with the reporter constructs allowed normalization. Luciferase activity of each combination was tested in triplicate after 48 hours. Error bars represent standard deviation between triplicates. (C) MZF1 binds to the same locus as MIXL1 on *c-REL* promoter. Quantitative PCR analysis of the identified *c-REL* promoter region and *c-REL* intron control region compared the abundance of each genomic locus immunoprecipitated by either IgG or MZF1 antibodies, normalized to a standard curve. Error bars represent standard deviation between triplicates. \* $p < 0.05$ . (D) Model depicting a potential MIXL1-TBX-MZF1 multiprotein complex activating *c-REL* transcription.

cases (Fig. 5B). *HOXA9* was up regulated in 10.8% of cases. Once again, very few samples had expression in either gene suggesting a mutually exclusive expression pattern. Furthermore, higher transcript levels of the three HOX genes previously characterized to be important in AML (non-clustered HOX genes *CDX2* [10], *HLX* [12], *HOXA9*) and *MIXL1* were mutually exclusive with a few exceptions (Fig. 5B). To rule out the apparent lack of overlap was due to the low threshold used, we validated this method by examining the transcript levels of *PBX3*, *MEIS1*, *HOXA9* encoding members of a multi protein complex [44–46]. Concomitant over expression of all three members in this AML dataset confirmed the applicability of this method (Supp. Fig. S3A).

To determine whether *MIXL1* expression was associated with any of the commonly identified somatic mutations the TCGA samples were queried for *NPM1*, *FLT3*, *DNMT3A*, and *TP53* mutations (Fig. 5C). The most frequent of these alterations were *TP53* mutations, seen in eight (38%) of the cases with *MIXL1* expression; interestingly, the eight cases constituted 66% of the 12 AML cases with *TP53* mutations in this dataset. The other recurrent mutations were less frequent. Four cases had mutations in *NPM1*; *DNMT3A*, and *IDH1* mutations appeared in three cases each; *FLT3* and *RUNX1* mutations appeared in two cases each; and a single case had a *JAK3* mutation. In total, 76% (16/21) of the cases with high *MIXL1* expression had common AML associated

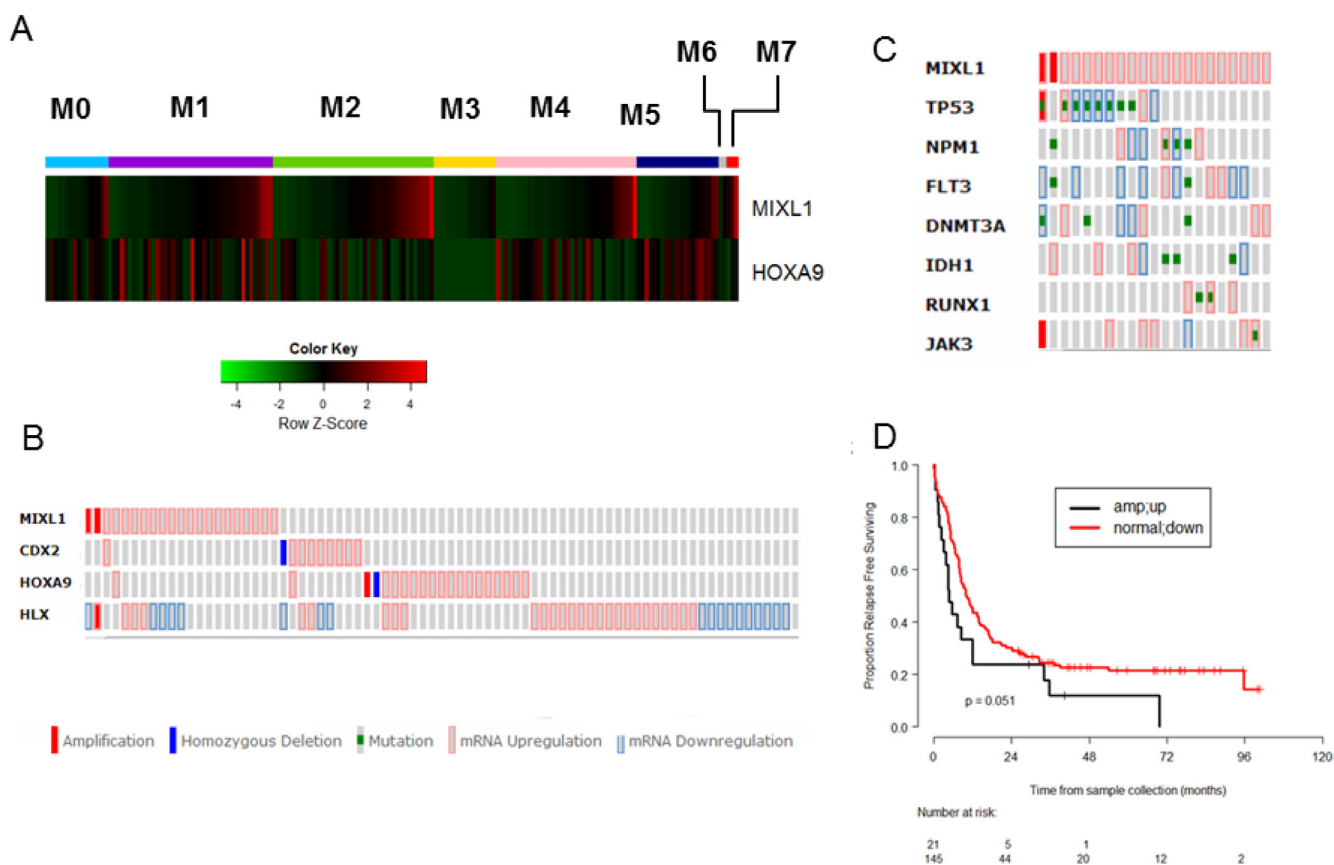

**Figure 5: High *MIXL1* expression denotes a distinct subset of AML.** (A) Mutually exclusive expression of *MIXL1* and *HOXA9* in distinct FAB subsets. The RNA-seq data are publicly available from the TCGA website (<https://tcga-data.nci.nih.gov/tcga/>). 177 samples of Acute Myeloid Leukemia classified by leukemia French American British morphology code (FAB) and a total of 20319 genes with expression values in the RPKM format were included. The data were quantile normalized using the normalize Quantiles function from the limma package. The expression levels of *MIXL1* and *HOXA9* of the 177 samples from 8 FAB categories were plotted in the heatmap using the heatmap.2 function in the gplots package of R 3.1.1. Within each FAB category, the samples were ordered according to the expression value of the *MIXL1* gene. (B) *MIXL1* upregulation identifies a non-overlapping AML subset from those expressing *CDX2*, *HOXA9*, or *HLX*. TCGA AML patient dataset was queried for alterations in expression as determined by RNA-Seq across 166 AML cases through the cBioPortal database. Each column represents a case of AML. *MIXL1* is amplified or upregulated in 13% of the total AML cases. Note the predominantly non-overlapping expression patterns of *MIXL1*, *CDX2*, *HOXA9*, and *HLX*. (C) Seventy-six percent (16/21) of *MIXL1*-expressing cases in TCGA AML dataset harbored somatic mutations common in AML (*NPM1*, *FLT3*, *DNMT3A*, *IDH1*, *RUNX1*, *JAK3*, and *TP53*). Each column represents a case. (D) Relapse-free survival of *MIXL1*-expressing cases is lower than that of non-*MIXL1*-expressing cases. TCGA AML cases were separated into two groups: *MIXL1*-expressing (increase in expression or amplified) and non-*MIXL1*-expressing. Relapse-free survival was then compared between the two groups using the Kaplan-Meier method.



mutations. To validate this approach we queried the mutational profile of *HOXA9* over expressing samples; these were predominant in the *NPM1* mutated cases (Supp. Fig. S3B) consistent with pediatric AML studies and murine models of *NPM1* mutations [47, 48].

Finally, to determine whether *MIXL1* expression impacts outcome in AML, the relapse-free survival rates were compared between samples with expressing *MIXL1* and those without readily detectable expression. The cases expressing *MIXL1* had notably shorter relapse-free survival than those without high *MIXL1* ( $p = 0.051$ ; Fig. 5D). In contrast, samples with increased expression of *CDX2*, *HLX* and *HOXA9* did not attain statistically significant event free survival by these criteria (Supp. Fig. S4 A-C).

### **BMP4 induces *MIXL1* in HSPCs and *MIXL1*-expressing AML cells are sensitive to the BMP inhibitor LDN-193189**

To determine whether there is a ligand preference between BMP and TGF- $\beta$  for *MIXL1* induction human cord blood-derived HSPCs from three donors were short-term cultured in the presence of BMP4 or TGF- $\beta$ . Upon 2 hours of treatment with BMP4, *MIXL1* transcript levels were 1.8–2 times higher than control HSPCs, whereas *MIXL1* was not induced by TGF- $\beta$  (Fig. 6A). These results suggested that BMP4 is a preferred ligand upstream of *MIXL1* in HSPCs. Since the HSPCs used are an enriched lineage-negative population composed primarily of progenitors with rare (<10%) stem cells, the response to BMP4 was likely in the progenitors. Notably, the consistent induction of *MIXL1* in three donor-derived HSPC lines signified a fundamental difference between the BMP4 and TGF- $\beta$  responses in these cells.

*MIXL1* induction by BMP4 raised the possibility that AML cells that express *MIXL1* have increased sensitivity to BMP pathway inhibition. The ALK2/3/6 (ACVR1, BMPR1A, and BMPR1B) inhibitor LDN-193189 shows a preference for BMP and activin signaling over TGF- $\beta$  signaling [49]. Four of the previously characterized high *MIXL1*-expressing cell lines (OCI-AML2, KG1, ML3, and K562) and two cell lines lacking *MIXL1* expression (U937 and HL60) were grown in medium containing 3  $\mu$ M LDN-193189 for 4 days. LDN-193189 was strongly cytotoxic to all the *MIXL1*-expressing cell lines, whereas HL60 and U937 cells recovered by day 4 after an initial setback (Fig. 6B). Since the high dose of LDN-193189 could have had off-target effects [50], we performed a dose-response assessment in the 0–700 nM range (Fig. 6C). Once again, the *MIXL1*-negative cell lines U937 and HL60 were relatively unaffected, whereas the 200–700nM range was cytotoxic to *MIXL1*-expressing cells. The differential sensitivity of these AML cell lines to LDN-193189 together with the BMP4-induced expression of *MIXL1* suggests that inhibition of the BMP receptor kinase may be an effective therapeutic approach

for *MIXL1* expressing AML cells. Furthermore, to exclude potential off target effects specific to *MIXL1* expressing cells, we tested LDN-193189 response in the stably transfected clonal U937 cells, 1MIXL1. There was no significant difference in sensitivity to LDN-193189 over 1–3  $\mu$ M range between control U937 and 1MIXL1 cells suggesting the cytotoxicity seen in AML cell lines to be primarily through type I BMP receptor pathway (Supp. Fig. S5).

## **DISCUSSION**

In this study, we identify *c-REL* as a direct transcriptional target of *MIXL1* and BMP4 as a ligand upstream of *MIXL1*. These findings implicate the BMP4–*MIXL1*–*c-REL* axis in AML pathogenesis. Notably, this pathway may be therapeutically targeted with type I BMP receptor kinase inhibitors.

### **Transcriptional targets of *MIXL1***

Several novel transcriptional targets of *MIXL1* were identified by ChIP-Seq and the importance of a number of these molecules and relevant pathways will be examined in the future. For this initial report, *c-REL* was of immediate relevance because of its established role in the activation of the anti-apoptotic gene *BCL2L1* encoding Bcl-XL protein [51]. Although the NF $\kappa$ B pathway is canonical, recent evidence suggests potential functional variations in the activity of *c-REL* depending on its subunit composition [52]. Thus, *c-REL* homodimers or heterodimers with NF $\kappa$ B2 or RELB may have varied transcriptional responses [53]. Among these *BCL2L1* encoding the BCL-X<sub>L</sub> protein is critical as silencing this pathway synergizes with hypomethylating agents in AML [54]. Likewise, retroviral expression of *BCL2A1* a lesser characterized anti-apoptotic molecule, enhances engraftment potential of hematopoietic stem cells and subsequent transformation to transplantable malignancies [55].

Although intriguing initially, recent studies suggest the possibility of a potential *MIXL1*-Tbox-MZF1-containing multiprotein complex. First, our unbiased target motif search based on rigorous ChIP sequencing studies identified potential zinc finger binding sites (Fig. 2D). Second, *MIXL1* and the T box factors T, Eomes, Tbx6, and Tbx20 interact directly in embryonic stem cells to regulate transcription [56]. Third, TBX20-MZF1 interaction has been identified in a high-throughput mammalian transcription factor interaction screen [57]. Therefore, our findings raise the possibility with a *MIXL1*/Tbox/MZF1 multiprotein complex that mediates transcriptional regulation of *c-REL*. Clearly, further studies are necessary to identify T box factor that bridges *MIXL1* and MZF1.

Thus, the absence of the consensus TAAT motifs in the ChIP targets together with MZF1 localization to the *c-REL*

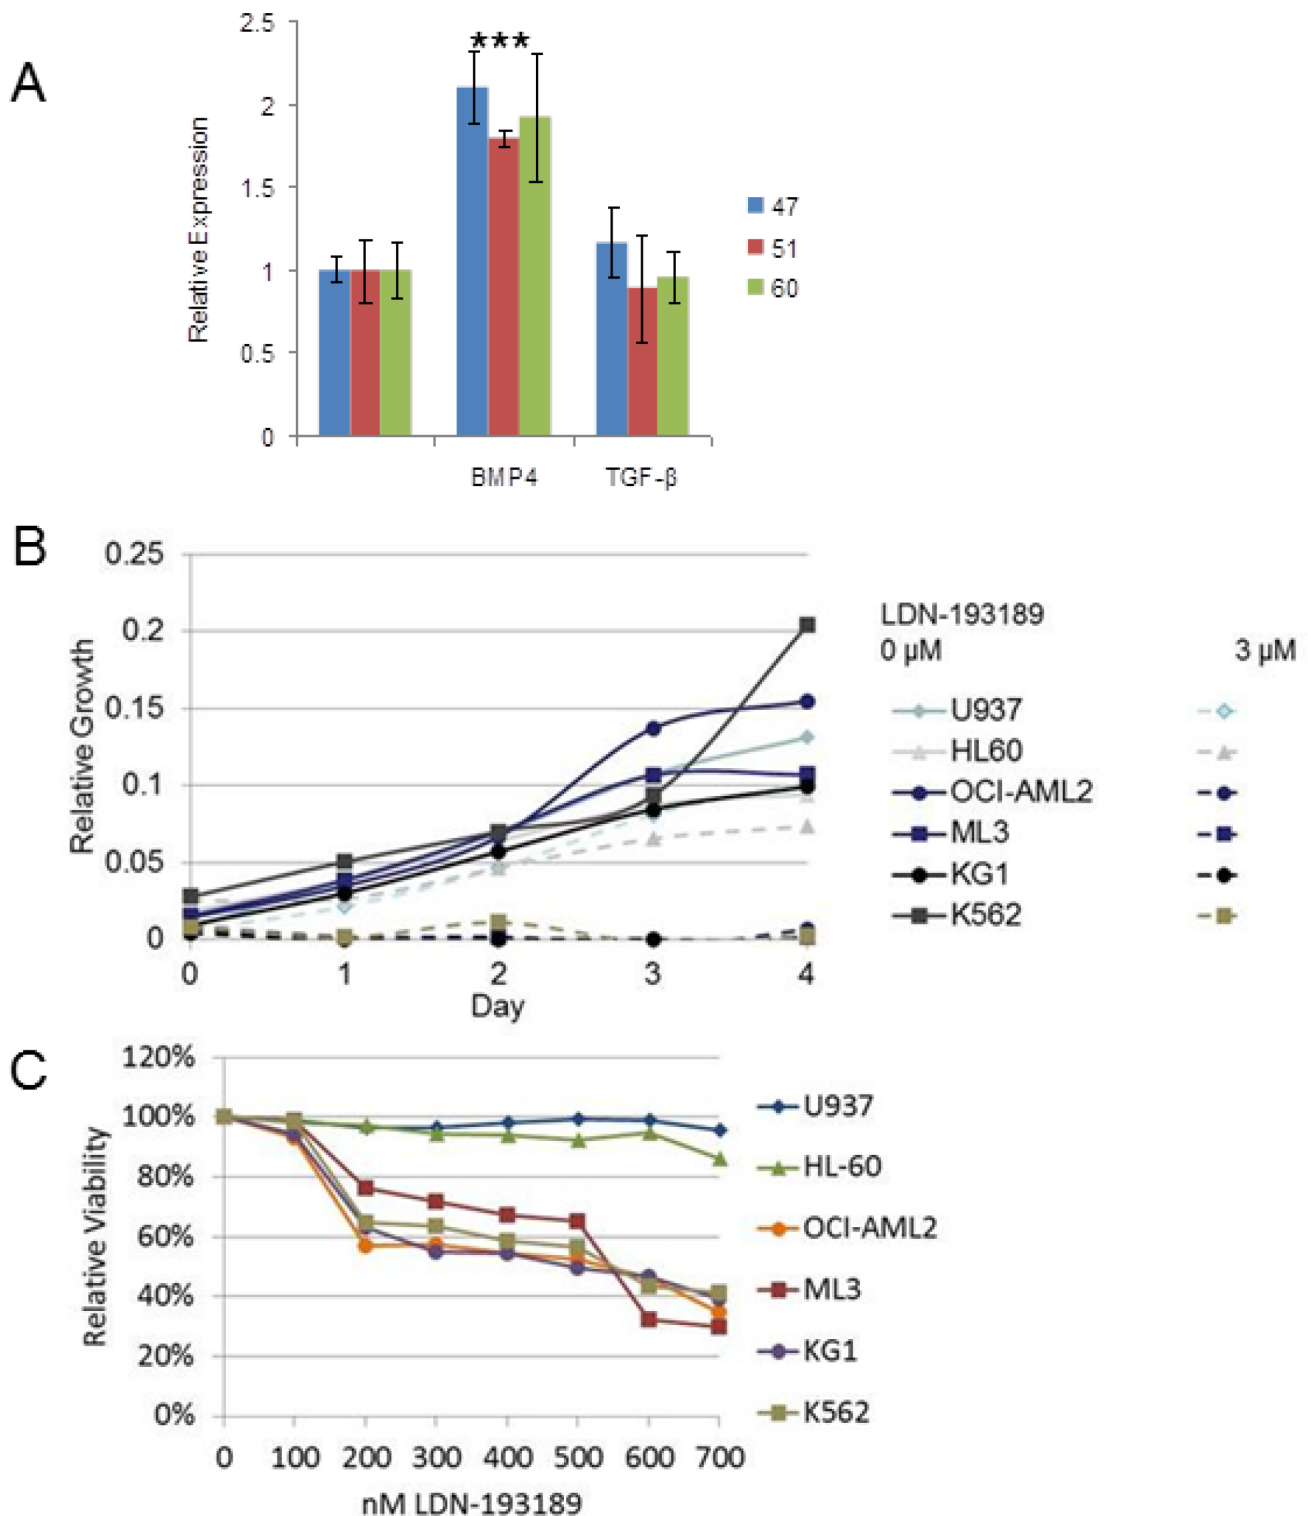

**Figure 6: BMP4 induced *MIXL1*, an important survival axis and therapeutic target in AML.** (A) *MIXL1* expression increased 2-fold in CD34<sup>+</sup> HSPCs treated with BMP4. CD34<sup>+</sup> HSPCs from three cord blood donors (unique donor number 47, 51, 60) were cultured with either 50 ng/ml BMP4 or 2 ng/ml TGF-β1 for 2 hours. *MIXL1* transcript levels were quantified by RT-qPCR using 18S rRNA as normalization control. Error bars represent standard deviation between triplicates. \**p* < 0.05. (B) LDN-193189 at 3 μM was cytotoxic to OCI-AML2, ML3, KG1, and K562 cells but not U937 and HL60 cells. Each cell line was treated with vehicle or 3 μM LDN-193189 on day 0, and viability was measured every 24 hours by MTS assay in triplicate. (C) OCI-AML2, ML3, KG1, and K562 were sensitive to 200 nM LDN-193189, while the non-*MIXL1*-expressing lines U937 and HL60 were unaffected. Each cell line was treated in triplicate with 0–700 nM LDN-193189, with the drug or control medium replenished every 24 hours, for 4 days. Viability on day 4 was assayed by MTS assay. Absorbance was normalized to that of control samples treated with vehicle only.

promoter (Fig. 4C) suggest that MIXL1-MZF1-containing multiprotein complexes, rather than MIXL1 homodimers, may be important in AML. Such a scenario would be analogous to, the paired type homeo box factor NKX2-5, TBX3, and zinc finger factor GATA4 multiprotein complex that plays a central role in cardiac development [58].

### **MIXL1 as a novel marker in AML**

*MIXL1*-expression makes up 13% of AMLs in the TCGA dataset, a group both distinct from and larger than the *CDX2*- and *HOXA9*-expressing subsets (Fig. 5A and 5B). Using the cBioPortal RNA-Seq data, we set the threshold low so that subtle yet pathologically relevant alterations may be detected. This group had a slightly lower rate of survival than those not expressing *MIXL1* (Fig. 5D), suggesting that *MIXL1* may be an independent prognostic marker.

Our analysis of TCGA AML dataset although small, agrees overall with the larger global profiling results for HOX expression in AML: *FLT3*-mutated AMLs have higher *HOXA9* expression [59], AMLs with mutant *NPM1* also show aberrant *HOXA9* expression [47], and the coordinate expression of three established members of a transcriptional complex—*HOXA9*, *MEIS1*, and *PBX3*—is common (Supp. Fig. 3A). Notably, the search for *MIXL1* expression in TCGA AML cases uncovered an elegant stratification of HOX expression, including some patterns of mutual exclusion. The mutual exclusivity of *MIXL1* and *HOXA9* expression (Fig. 5A and 5B) suggests the specific homeobox genes might cooperate with distinct driver mutations. Lack of *MIXL1* expression in AML M3 acute promyelocytic leukemia (Fig. 5A), frequently associated with the PML-RARA translocation arising in the context of myeloid restricted gene expression program is also consistent with such a model. Collectively, these results suggest that quantitative evaluation of both clustered and non-clustered HOX transcripts in AML may stratify AML further. Such an evaluation may elucidate whether HOX expression reflects the stage of progenitor maturation which cooperates with the driver mutations. Interestingly, a recent report in pediatric AML suggests a similar pattern of mutual exclusion; namely *HOXA* and *HOXB* down regulation in cases of *RUNX1* or *PML/RARA* translocation or *CEBPA* double mutations, *HOXA* up regulation, *HOXB* down regulation in cases of *MLL* translocation and *MYST* up regulation, or *HOXA* and *HOXB* upregulation in patients with *NPM1* mutation, and *NUP98* translocations. Thus the HOX expression pattern could be segregated by distinct cytogenetic or driver mutations [60, 61].

Functionally, the decreased drug sensitivity of MIXL1 expressing U937 clones shown in Fig. 1A is suggestive of an antiapoptotic advantage conferred

through *c-REL*. Whereas this is the only readily detectable difference in U937 cells, in KG1 cells genetic ablation of endogenous *MIXL1* results in loss of viability (Fig. 3D) which is rescued by *c-REL*. Such a significant difference between the two AML cell lines could be explained in part by the fundamental difference in the driver mutations in these cell lines. U937 cells harbor a *CALM-AF10* translocation [62] whereas KG1 is driven by a constitutively activated FGFR1 tyrosine kinase due to *FGFR1OP2-FGFR1* translocation [63]. *CALM-AF10* fusion induces *HOXA* over expression in murine models [64]. Recent studies demonstrate CALM-AF10 mediated epigenetic reprogramming of *HOXA* locus to be dependent on nuclear exporter CRM1. Thus the transcriptional circuit in U937 cells is distinct from that of KG1. Therefore, U937 cells may be addicted to other HOX cluster mediated growth and clonogenic advantage whereas KG1 cells may be dependent on MIXL1.

### **Therapeutic potential of targeting type 1 BMP receptor**

*Mix.1* is induced in *Xenopus* embryos by BMP4 or activin A in a SMAD5-dependent manner [22, 23], and *MIXL1* can be induced by TGF- $\beta$  in human hepatocellular carcinoma [65] and in mouse embryonic stem cells [26]. TGF- $\beta$  from the glial cells within the bone marrow niche is thought to maintain hematopoietic stem cell quiescence [27]. BMP proteins regulate maintenance, proliferation, and repopulating activities of hematopoietic progenitors [66–68]. A recent study reported that BMP receptor IB is required for the expansion of primitive chronic myelogenous leukemia stem cells, raising the possibility of targeting this pathway in chronic myelogenous leukemia [69]. Additionally, a subset of pediatric AML cases with a novel translocation *CBFA2T3-GLIS2* and poor outcomes express BMP2 constitutively and respond *in vitro* to dorsomorphin, a precursor molecule to LDN-193189. Importantly, these studies demonstrated murine bone marrow cells transduced with *CBFA2T3-GLIS2* to be more sensitive to dorsomorphin than wild type cells in colony forming assays [70]. Our findings demonstrate for the first time that *MIXL1* is induced in human HSPCs by BMP4. Future studies will uncover whether the BMP ligand for *MIXL1* induction in HSPCs is stromally derived or autocrine. Above all, our findings suggest the ACVR1/BMPRI pathway to be preferentially engaged to induce *MIXL1* in hematopoietic stem cells or progenitors. As shown in Fig. 7A the canonical type II receptor dimer phosphorylates the type I receptor upon ligand binding [25]. The phosphorylated type I receptor in turn may phosphorylate SMADs 1 or 5 which translocate to the nucleus to activate *MIXL1* expression. Our findings are consistent with existence of such a pathway in *MIXL1*

expressing KG1, OCI-ML2 and K562 cells. Of note, studies from the Zon laboratory showed BMP2 treatment of K562 and U937 recruited phosphor SMAD1 with lineage specific factors (erythroid factor GATA1 in K562 cells derived from chronic myelogenous leukemia in erythroid blast crisis and CEBPA in U937 myelomonocytic cells) [71]. A search of the ChIP seq data from this study in the public domain revealed SMAD1 binding to *MIXL1* promoter in K562 and not U937 cells. Thus a potential model shown in Fig. 7B suggests expression of *MIXL1* induced by BMP or related ligand can be inhibited by LDN-193189 to induce cell death. Recent studies in lung cancer cell lines demonstrate potent inhibition of clonogenic potential of lung cancer cells by LDN-193189 in a SMAD dependent manner [72].

Of note, two thirds of TCGA AML samples with *TP53* mutations, a subset with very few therapeutic options, had high *MIXL1* expression. The significance of *MIXL1* expression is further heightened in the context of BMP pathway suppression in the AML cell lines KG1 and K562, which have compromised TP53 activity. The differential cytotoxicity by 3  $\mu$ M LDN-193189 specific to those lines indicate that a defined subtype of AML may be responsive to type I BMP receptor kinase suppression. LDN-193189 also inhibits non canonical BMP signaling [73]. This would be a significant boon, as LDN-193189

has already been used in rodent models of hepcidin-induced chronic anemia and fibrodysplasia ossificans progressiva (FOP) with constitutive activation of ACVR1, a type 1 BMP receptor kinase [49, 74]. A caveat, however, is that LDN-193189 inhibits ALK2/3/6 kinases (ACVR1, BMPR1A, and BMPR1B) [75], and its activity may inhibit other type I receptors of the TGF family ligands. Other kinases that LDN-193189 can bind and inhibit include SIK1, ABL, VEGFR, YES1, CAMKK2 [76]. While many of these kinases may be useful therapeutic targets themselves, the role that inhibition of BMP or related ligands would play in AML needs further evaluation. Indeed, a soluble activin receptor that sequesters the ligand is showing promise in myelodysplasia, a clonal disorder and common precursor to AML [77, 78].

In summary, we define for the first time the potential role of *MIXL1* in human AML and implicate *c-REL* as a direct transcriptional *MIXL1* target to confer an anti apoptotic advantage. More extensive studies are required to define mutually exclusive expression of *MIXL1* from other HOXs, inducibility of *MIXL1* by BMP4 and above all preferential sensitivity of *MIXL1* expressing AML cells to BMPR1 inhibitors. The findings reported here provide a compelling rationale for future investigations which may lead to a novel targeted therapy for an aggressive subset of AML.

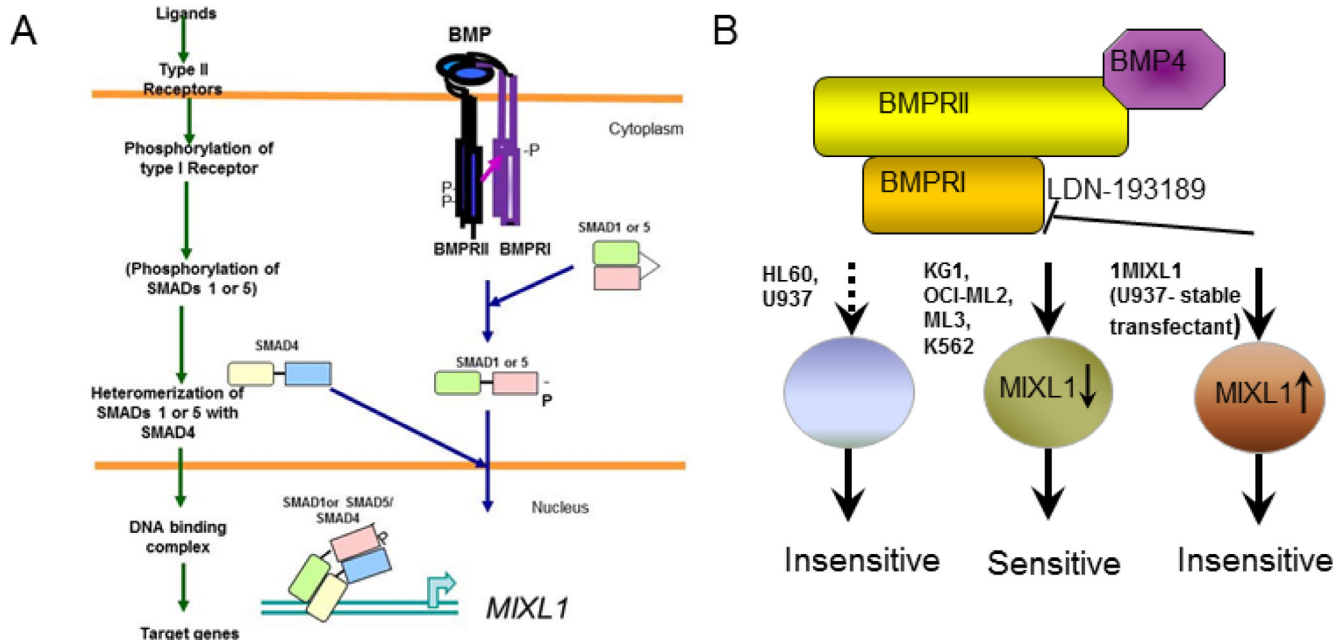

**Figure 7: BMP4 induced *MIXL1* an important survival axis and therapeutic target in AML.** (A) Canonical BMP signaling pathway. Upon BMP binding to type II receptor (BMPRII), type I receptor BMPRI is phosphorylated. Activated BMPRI phosphorylates SMAD1 or 5 which heterodimerizes with SMAD4 to up regulate *MIXL1* expression. (B) BMPRI mediated signal is hypothesized to induce endogenous *MIXL1* expression in KG1, OCI-ML2, ML3 and K562 cell lines. These cells are sensitive to BMPRI inhibitor LDN-193189. Enforced expression of *MIXL1* in U937 cells 1MIXL1 is independent of BMP signaling and therefore insensitive to LDN-193189. In HL60 and U937 cells which are insensitive to LDN-193189, the pathway may be absent or modified.

## MATERIALS AND METHODS

### Cell culture

AML cell lines U937, HL60, OCI-AML2, and ML3 and chronic myeloid leukemia cell line K562 were grown in 5% CO<sub>2</sub>, 95% humidified air at 37°C in RPMI 1640 with 10% fetal bovine serum. KG1 cells were grown in RPMI 1640 with 20% fetal bovine serum. Human embryonic cell line HEK-293T was grown in Dulbecco's Modified Eagle Medium with 10% fetal bovine serum.

We established two clonal lines, 1MIXL and 2MIXL, expressing amino FLAG- and HA-tagged MIXL1 driven by a Tet response element in the U937 clonal line expressing the tetracycline-controlled transactivator protein as previously described [28, 79, 80]. A clonal line transfected with the vector served as a control. After multiple passages, we noted that both lines were leaky regardless of the selection pressure. Therefore, 1MIXL and 2MIXL were treated as stable MIXL1 overexpression clones without any selection agent or tetracycline.

### Human cord blood hematopoietic stem progenitors

Human CD34<sup>+</sup> progenitor cells were acquired from cord blood as described previously [81]. Briefly, mononuclear cells were isolated from umbilical cord blood by density gradient separation, followed by enrichment of CD34<sup>+</sup> cells via magnetic bead separation. CD34<sup>+</sup> HSPCs were cultured in TGF-β or BMP4 for 2 hours.

### Lentiviral knockdown

Lentiviral constructs were from Open Biosystems (Pittsburgh, PA) and designated as follows: MIXL1 KD1 = TRCN0000019155, MIXL KD2 = TRCN0000019156, and Rel Expression = ccsbBroad304\_11094. The protocol for lentiviral production was similar to that of Moffat et al. in HEK293T cells by transient transfection of the lentiviral construct, the envelope construct pCMV-VSV-G, and the gag-pol construct at a ratio of 2:1:1, respectively [82].

Transductions of AML cells were performed by resuspending  $2 \times 10^5$  cells in 1 ml of virus-containing medium with 8 μg/ml polybrene and incubating the suspension at 37°C for 24 hours prior to pelleting by centrifugation and resuspension in growth medium. Growth assay and expression experiments were performed 48 hours after transduction in medium containing 2 μg/ml puromycin.

### Chromatin immunoprecipitation

Chromatin immunoprecipitation was based on the procedure used by Chadee et al. [83] with the following modifications. For each U937 cell line, a total

of  $10^8$  cells were cross-linked with 1% formaldehyde in growth medium at 37°C for 20 minutes. Cells were harvested by centrifugation at 3000 rpm for 10 minutes and resuspended in 500 μl of radio-immunoprecipitation assay (RIPA) lysis buffer. After 10 minutes on ice, the cells were sonicated 20 times at 4–5 watts for 20 seconds, with a rest time of 40 seconds between each sonication. The samples were then centrifuged for 5 minutes at 4°C and precleared with 20 μl of A/G agarose slurry for 1 hour at 4°C. Two aliquots from each lysate were processed as follows: Flag-IP with 240 μl of the lysate, 250 μl of lysis buffer, and 8.4 μg of mouse anti-flag antibody (anti-Flag-M2; Sigma-Aldrich, St. Louis, MO) and IgG-IP with 240 μl of the lysate, 250 μl of lysis buffer, and 8.4 μg of mouse IgG. The samples were incubated overnight at 4°C with rotation and then incubated for an additional hour with 20 μl of A/G agarose slurry. The agarose beads were recovered by centrifugation and washed for 15 minutes each in RIPA lysis buffer, high-salt RIPA buffer, lithium chloride RIPA buffer, and finally TE buffer prior to proteinase K and RNase treatment at 37°C overnight. The samples were incubated for 6 hours at 65°C to reverse the cross-linking. DNA was precipitated overnight at –20°C in 75% ethanol and then washed twice in 75% ethanol. For each sample, DNA from a 20-μl aliquot of the pre-immunoprecipitation lysate diluted with 180 μl of TE buffer served as another control for target amplification. The DNAs were resuspended in 50 μl of ddH<sub>2</sub>O, and the pre-immunoprecipitation sample was diluted with 450 μl of ddH<sub>2</sub>O. Fifty nanograms each of immunoprecipitated DNAs from (1) U937 control IgG-IP, (2) U937 control Flag-IP, (3) U937 1MIXL Flag-IP, and (4) U937 2MIXL Flag-IP were used to construct libraries at the Sequencing and Microarray Facility at The University of Texas MD Anderson Cancer Center using the Beckman SPRIworks system, Pasadena, CA. Illumina analysis pipeline (GAPipeline-1.5.0 San Diego, CA) was used for base calling and alignment to the human genome. Peak calling was done by MACS v1.3.7.1 with  $p \leq 1e-5$  considered significant. Peaks were identified against the human genome (University of California, Santa Cruz, genome browser assembly hg18, NCBI36) using genome model-based analysis of ChIP-Seq (MACS) [84]. Unique peaks were generated by normalizing to the two control samples in three combinations: Flag-1MIXL to IgG-control and Flag-control, Flag-2MIXL to IgG-control and Flag-control, and Flag-1MIXL and Flag-2MIXL combined to IgG-control and Flag-control. The primary dataset used for analysis comprised the overlapping peaks in all three analyses. The combined dataset was tested for predicted Paired-Q9 binding motifs [34, 35] using MAST [85], and enriched motifs were identified using MEME [38].

ChIP-PCR confirmation was performed by SYBR green system quantitative PCR using an exonic REL region primer set as a control and the following primer sets: REL internal region (5'-TTACCAGGATTTTGGCAAGG-3'

and 5'-CAGGCAGTTTGGGGATAAGA-3'), REL peak (5'-GGAACCACCTCTCGAAAACC-3' and 5'-TCCAGGTTGTTCTTCCGAGT-3'), EIF1 peak (5'-TGA CTCCGTGGGTAGTAGGG-3' and 5'-CCTTCTTGACCCTGTTGCAT-3'), SLC39A13 peak (5'-CCTGAGGTTCCAGTGAAAA-3' and 5'-GAGGACTACTGTGCGCTCCT-3'), SMYD5 peak (5'-TTCCCCCTTTCATGACTCTG-3' and 5'-CTCAGCTCAGTCCCCAAGAG-3'), and ZP3 peak (5'-ACCTCAGCCTCCCCAGTAGT-3' and 5'-TTGATCCAAAAGCAGCTGAA-3'). For ChIP-qPCR against endogenous proteins, 5 µg of anti-MIXL1-N, or 5 µg of anti-MIXL1-C antibodies were used for immunoprecipitation.

### Global expression profiling

To identify potential targets of the MIXL1 transcription factor, we performed global expression profiling analysis on *MIXL1*-expressing cells by microarray. The 1MIXL and control cell lines were cultured without Tet for 24 hours at  $5 \times 10^4$  cells/ml. RNA was extracted from  $5 \times 10^6$  cells by RNeasy Mini Kit (QIAGEN, Valencia, CA). Extracted RNA was hybridized against a HG-U133A Microarray (Affymetrix, Santa Clara, CA).

For analysis, dChip analyzer software [86] was used, normalizing the 1MIXL dataset to the control dataset, and gene expression models were obtained through the Perfect Model-only approach. Differentially expressed genes were defined as genes in which the difference between the detected expression levels was at least 100 and the ratio was at least 1.2.

### Public access

The ChIP Seq data can be accessed at GSE52781 and the expression profiling is designated GSE52622

### RT-qPCR

RNA was extracted using the RNeasy Mini Kit (QIAGEN), and cDNA was prepared by reverse transcription using SuperScript II (Life Technologies, Carlsbad, CA). The samples were assayed by qPCR in triplicate using the following TaqMan primers: MIXL1 (Hs00968440\_m1), REL (Hs00231279\_m1), BCL2L1 (Hs99999146\_m1), BCL2A1 (Hs00187845\_m1).

For CD34<sup>+</sup> cells, RNA was harvested in triplicate from approximately 2,500 cells using the RNeasy Plus Micro Kit (QIAGEN) 2 hours after the addition of either 50 ng/ml BMP4 (R&D Systems, Minneapolis, MN) or 2 ng/ml TGF-β1 (Sigma-Aldrich) in X-VIVO 15 medium

(Lonza, Allendale, NJ), and then 100 ng from each sample was reverse transcribed and assayed.

### Immunoblotting

The Western blotting technique was performed as previously described [17] using the following modifications: Samples lysed with whole cell lysis buffer (20 mM Tris, 250 mM NaCl, 2 mM EDTA, 1% Triton X-100, 1 mM DTT 2 µg/ml aprotinin, 2 µg/ml leupeptin, 2 µg/ml pepstatin A, 1 mM NaVO<sub>3</sub>, 1 mM PMSF), were resolved on 10% NuPAGE gel (Life Technologies), and a mixture of Tris-buffered saline and Tween 20 (50 mM Tris, 150 mM NaCl, and 0.05% Tween 20 adjusted to pH 7.6) was used for immunoblotting. The primary antibodies used were anti-MIXL1-N at a dilution of 1:1,500 and beta-actin (Sigma Aldrich) at 1:5,000. The secondary antibodies used were anti-rabbit horseradish peroxidase (GE Healthcare Wauwatosa, WI at 1:10,000 and anti-mouse horseradish peroxidase (GE Healthcare) at 1:7,000 for the beta-actin primary antibody.

### Luciferase assay

Luciferase constructs were generated by PCR amplification of normal human DNA segments of the REL peak region identified by ChIP-Seq. Promoter segments were amplified from genomic DNA by PCR using the following probes:

Rel-R-EcoR1  
(5'-ctgtgaattcCGCAGTCAGTCAGTCAGGAG-3'),  
Rel-FM-130  
(5'-ctgtacgcgtAGAATTCAGGGGTTGGGAAG-3'),  
Rel-FM-500  
(5'-ctgtacgcgtGGAAGAACAACCTGGAGGAG-3'),  
Rel-FM-700  
(5'-ctgtacgcgtGAACCACCTCTCGAAAACC-3'),  
Rel-FM-944  
(5'-ctgtacgcgtGGAGCTTTGGAGTCAGACAA-3'),  
Rel-RE-150  
(5'-ctgtgaattcCAGGTTGTTCTTCCGAGT-3'),  
Rel-RE-200  
(5'-ctgtgaattcGGCTAGCAGCGTGAGAAGG-3'),  
Rel-RE-300  
(5'-ctgtgaattcGACGCAGCAACCCTCACC-3'), and  
Rel-RE-580  
(5'-ctgtgaattcAACCCTGAATTCTTGCAC-3'). Each was then sub-cloned into the pBV-Luc vector between the MluI and EcoR1 sites. 293T cells were transfected with 200 ng of expression vector, 200 ng of luciferase vector, and 0.2 ng of *Renilla* luciferase vector by Lipofectamine (Invitrogen, Grand Island, NY). The activity was then tested by the Dual-Luciferase Reporter Assay System (Promega, Madison, WI) 48 hours post-transfection.

## Methanethiosulfonate (MTS) assay

The MTS assay in which a tetrazolium compound is reduced by cellular NADH to generate colorimetrically detectable formazon product was used to quantify cell number and viability. The amount of product formed was a direct function of the number of viable cells. For comparative analysis of the effects of doxorubicin on U937 *MIXL1*-overexpressing lines, doxorubicin (Sigma-Aldrich) was added to the cell lines at 0–2  $\mu\text{M}$  in triplicate, for 24 hours of incubation before MTS treatment. Comparison of knockdown cell lines was performed by plating  $3 \times 10^4$  cells/well for each line into a 96-well plate in triplicate and then adding the CellTiter 96 AQueous Non-Radioactive Cell Proliferation Assay kit (Promega) with a 1-hour incubation, following the manufacturer's instructions. For LDN-193189 treatment, each cell line was grown in growth medium containing either 3  $\mu\text{M}$  LDN-193189 (Cellagen Technology, San Diego, CA) or vehicle (dimethyl sulfoxide) in triplicate for 4 days with growth measured every 24 hours. For the dose-response studies, each line was grown in 0–0.7  $\mu\text{M}$  LDN-193189 in triplicate replenished with fresh drug-containing medium every 24 hours to account for loss of drug activity at 37°C, and the MTS assay was performed at day 4.

## Bioinformatics and data mining

The functionality of the gene list from CHIP-seq, was analyzed for gene ontology analysis and tissue expression with the software DAVID (The Database for Annotation, Visualization and Integrated Discovery version 6.7 [31–33]). The functional analysis in DAVID evaluated gene-to-gene similarity by utilizing the terms from gene ontology [87]

The RNA-seq data were publicly available from the TCGA website (<https://tcga-data.nci.nih.gov/tcga/>). 177 AML samples stratified by leukemia French American British morphology classification (FAB) and a total of 20319 genes with expression values in the RPKM format were included. The data were quantile normalized using the `normalizeQuantiles` function from the `limma` package [88]. The expression levels of *MIXL1* and *HOXA9* of the 177 samples from 8 FAB categories were plotted in the heatmap using the `heatmap.2` function in the `gplots` package of R 3.1.1 (Development Core Team . R Foundation for Statistical Computing, Vienna, Austria: 2009. R: A language and environment for statistical computing. ISBN 3-900051-07-0, URL <http://www.R-project.org>). Within each FAB category, the samples were ordered according to the expression value of the *MIXL1* gene. Additionally, TCGA AML database [8] was accessed and analyzed through the cBioPortal [43, 89] for cases with a mutation, copy-number alteration, or expression change over a threshold of 1.0 in the genes of interest. For statistical analysis,

clinical data and expression data from the 166 samples were collected from the TCGA AML dataset for whom outcome was available [8] and compared between the amplified or upregulated group and the normal, loss, or down-regulated group for each gene. The unadjusted distribution of relapse-free survival was evaluated by the method of Kaplan and Meier [90], and the differences in the distributions between expression levels were compared using the log-rank test.

Transcription factor binding motifs in the *c-REL* promoter were identified using TFSEARCH [91].

## Dedication

We dedicate this article to Dr. Ken D. Bloch's memory. We are thankful for his enthusiastic support of the studies on LDN-193189.

## ACKNOWLEDGEMENTS

We thank support from Abraham J. and Phyllis Katz Foundation, Loper family foundation and Developmental research grant from the Leukemia SPORE grant P50-CA100632, MDACC bridge funds and emergency funds at the Graduate School of Biomedical sciences, MDACC, UTHSC. Special thanks to Dr. Lou Ramgali for the ChIP sequencing service provided by The University of Texas MD Anderson Cancer Center Sequencing and Microarray Facility supported by the CCSG core grant CA16672. We gratefully acknowledge Drs. Yas Kurasawa, Michael Andreeff, Jorge Cortes, Zeev Estrov, Guillermo Garcia-Manero, Hagop Kantarjian and Steven Kornblau for helpful discussions.

## REFERENCES

1. Dohner H, Estey EH, Amadori S, Appelbaum FR, Buchner T, Burnett AK, Dombret H, Fenaux P, Grimwade D, Larson RA, Lo-Coco F, Naoe T, Niederwieser D, Ossenkoppele GJ, Sanz MA, Sierra J, et al. Diagnosis and management of acute myeloid leukemia in adults: recommendations from an international expert panel, on behalf of the European LeukemiaNet. *Blood*. 2010; 115:453–474.
2. Burnett A, Wetzler M, Lowenberg B. Therapeutic advances in acute myeloid leukemia. *J Clin Oncol*. 2011; 29:487–494.
3. Ley TJ, Minx PJ, Walter MJ, Ries RE, Sun H, McLellan M, DiPersio JF, Link DC, Tomasson MH, Graubert TA, McLeod H, Khoury H, Watson M, Shannon W, Trinkaus K, Heath S, et al. A pilot study of high-throughput, sequence-based mutational profiling of primary human acute myeloid leukemia cell genomes. *Proc Natl Acad Sci U S A*. 2003; 100:14275–14280.
4. Ley TJ, Mardis ER, Ding L, Fulton B, McLellan MD, Chen K, Dooling D, Dunford-Shore BH, McGrath S, Hickenbotham M, Cook L, Abbott R, Larson DE,

- Koboldt DC, Pohl C, Smith S, et al. DNA sequencing of a cytogenetically normal acute myeloid leukaemia genome. *Nature*. 2008; 456:66–72.
5. Mardis ER, Ding L, Dooling DJ, Larson DE, McLellan MD, Chen K, Koboldt DC, Fulton RS, Delehaanty KD, McGrath SD, Fulton LA, Locke DP, Magrini VJ, Abbott RM, Vickery TL, Reed JS, et al. Recurring mutations found by sequencing an acute myeloid leukemia genome. *N Engl J Med*. 2009; 361:1058–1066.
  6. Link DC, Schuettpeitz LG, Shen D, Wang J, Walter MJ, Kulkarni S, Payton JE, Ivanovich J, Goodfellow PJ, Le Beau M, Koboldt DC, Dooling DJ, Fulton RS, Bender RH, Fulton LL, Delehaanty KD, et al. Identification of a novel TP53 cancer susceptibility mutation through whole-genome sequencing of a patient with therapy-related AML. *JAMA : the journal of the American Medical Association*. 2011; 305:1568–1576.
  7. Walter MJ, Shen D, Ding L, Shao J, Koboldt DC, Chen K, Larson DE, McLellan MD, Dooling D, Abbott R, Fulton R, Magrini V, Schmidt H, Kalicki-Veizer J, O’Laughlin M, Fan X, et al. Clonal architecture of secondary acute myeloid leukemia. *N Engl J Med*. 2012; 366:1090–1098.
  8. Network CGAR. Genomic and epigenomic landscapes of adult de novo acute myeloid leukemia. *N Engl J Med*. 2013; 368:2059–2074.
  9. Hughes AE, Magrini V, Demeter R, Miller CA, Fulton R, Fulton LL, Eades WC, Elliott K, Heath S, Westervelt P, Ding L, Conrad DF, White BS, Shao J, Link DC, DiPersio JF, et al. Clonal architecture of secondary acute myeloid leukemia defined by single-cell sequencing. *PLoS Genet*. 2014; 10:e1004462.
  10. Scholl C, Bansal D, Döhner K, Eiwen K, Huntly BJ, Lee BH, Rücker FG, Schlenk RF, Bullinger L, Döhner H, Gilliland DG, Fröhling S. The homeobox gene CDX2 is aberrantly expressed in most cases of acute myeloid leukemia and promotes leukemogenesis. *J Clin Invest*. 2007; 117:1037–1048.
  11. Rawat VP, Thoene S, Naidu VM, Arseni N, Heilmeyer B, Metzeler K, Petropoulos K, Deshpande A, Quintanilla-Martinez L, Bohlander SK, Spiekermann K, Hiddemann W, Feuring-Buske M, Buske C. Overexpression of CDX2 perturbs HOX gene expression in murine progenitors depending on its N-terminal domain and is closely correlated with deregulated HOX gene expression in human acute myeloid leukemia. *Blood*. 2008; 111:309–319.
  12. Kawahara M, Pandolfi A, Bartholdy B, Barreyro L, Will B, Roth M, Okoye-Okafor UC, Todorova TI, Figueroa ME, Melnick A, Mitsiades CS, Steidl U. H2.0-like homeobox regulates early hematopoiesis and promotes acute myeloid leukemia. *Cancer Cell*. 2012; 22:194–208.
  13. Frohling S, Scholl C, Bansal D, Huntly BJ. HOX gene regulation in acute myeloid leukemia: CDX marks the spot? *Cell Cycle*. 2007; 6:2241–2245.
  14. Argiropoulos B, Humphries RK. Hox genes in hematopoiesis and leukemogenesis. *Oncogene*. 2007; 26:6766–6776.
  15. Eklund EA. The role of HOX genes in malignant myeloid disease. *Current opinion in hematology*. 2007; 14:85–89.
  16. Eklund E. The role of Hox proteins in leukemogenesis: insights into key regulatory events in hematopoiesis. *Critical reviews in oncogenesis*. 2011; 16:65–76.
  17. Guo W, Chan AP, Liang H, Wieder ED, Molldrem JJ, Etkin LD, Nagarajan L. A human Mix-like homeobox gene MIXL shows functional similarity to Xenopus Mix.1. *Blood*. 2002; 100:89–95.
  18. Drakos E, Rassidakis GZ, Leventaki V, Guo W, Medeiros LJ, Nagarajan L. Differential expression of the human MIXL1 gene product in non-Hodgkin and Hodgkin lymphomas. *Hum Pathol*. 2007; 38:500–507.
  19. Glaser S, Metcalf D, Wu L, Hart AH, DiRago L, Mifsud S, D’Amico A, Dagger S, Campo C, Chan AC, Izon DJ, Robb L. Enforced expression of the homeobox gene Mix11 impairs hematopoietic differentiation and results in acute myeloid leukemia. *Proc Natl Acad Sci U S A*. 2006; 103:16460–16465.
  20. Metcalf D, Glaser S, Mifsud S, Di Rago L, Robb L. The preleukemic state of mice reconstituted with Mix11-transduced marrow cells. *Proc Natl Acad Sci U S A*. 2007; 104:20013–20018.
  21. Willey S, Ayuso-Sacido A, Zhang H, Fraser ST, Sahr KE, Adlam MJ, Kyba M, Daley GQ, Keller G, Baron MH. Acceleration of mesoderm development and expansion of hematopoietic progenitors in differentiating ES cells by the mouse Mix-like homeodomain transcription factor. *Blood*. 2006; 107:3122–3130.
  22. Rosa FM. Mix.1, a homeobox mRNA inducible by mesoderm inducers, is expressed mostly in the presumptive endodermal cells of Xenopus embryos. *Cell*. 1989; 57:965–974.
  23. Mead PE, Brivanlou IH, Kelley CM, Zon LI. BMP-4-responsive regulation of dorsal-ventral patterning by the homeobox protein Mix.1. *Nature*. 1996; 382:357–360.
  24. Mead PE, Zhou Y, Lustig KD, Huber TL, Kirschner MW, Zon LI. Cloning of Mix-related homeodomain proteins using fast retrieval of gel shift activities, (FROGS), a technique for the isolation of DNA-binding proteins. *Proc Natl Acad Sci U S A*. 1998; 95:11251–11256.
  25. Feng XH, Derynck R. Specificity and versatility in tgfbeta signaling through Smads. *Annu Rev Cell Dev Biol*. 2005; 21:659–693.
  26. Xi Q, Wang Z, Zaromytidou AI, Zhang XH, Chow-Tsang LF, Liu JX, Kim H, Barlas A, Manova-Todorova K, Kaartinen V, Studer L, Mark W, Patel DJ, Massague J. A poised chromatin platform for TGF-beta access to master regulators. *Cell*. 2011; 147:1511–1524.



27. Yamazaki S, Ema H, Karlsson G, Yamaguchi T, Miyoshi H, Shioda S, Taketo MM, Karlsson S, Iwama A, Nakauchi H. Nonmyelinating Schwann cells maintain hematopoietic stem cell hibernation in the bone marrow niche. *Cell*. 2011; 147:1146–1158.
28. Boer J, Bonten-Surtel J, Grosveld G. Overexpression of the nucleoporin CAN/NUP214 induces growth arrest, nucleocytoplasmic transport defects, and apoptosis. *Molecular and cellular biology*. 1998; 18:1236–1247.
29. Caslini C, Shilatifard A, Yang L, Hess JL. The amino terminus of the mixed lineage leukemia protein (MLL) promotes cell cycle arrest and monocytic differentiation. *Proc Natl Acad Sci U S A*. 2000; 97:2797–2802.
30. Kandilci A, Grosveld GC. Reintroduction of CEBPA in MN1-overexpressing hematopoietic cells prevents their hyperproliferation and restores myeloid differentiation. *Blood*. 2009; 114:1596–1606.
31. Huang da W, Sherman BT, Lempicki RA. Systematic and integrative analysis of large gene lists using DAVID bioinformatics resources. *Nat Protoc*. 2009; 4:44–57.
32. Huang da W, Sherman BT, Lempicki RA. Bioinformatics enrichment tools: paths toward the comprehensive functional analysis of large gene lists. *Nucleic acids research*. 2009; 37:1–13.
33. Huang da W, Sherman BT, Zheng X, Yang J, Imamichi T, Stephens R, Lempicki RA. Extracting biological meaning from large gene lists with DAVID. *Current protocols in bioinformatics/editorial board, Andreas D Baxeavanis [et al]*. 2009; Chapter 13:Unit 13 11.
34. Wilson D, Sheng G, Lecuit T, Dostatni N, Desplan C. Cooperative dimerization of paired class homeo domains on DNA. *Genes Dev*. 1993; 7:2120–2134.
35. Wilson DS, Sheng G, Jun S, Desplan C. Conservation and diversification in homeodomain-DNA interactions: a comparative genetic analysis. *Proc Natl Acad Sci U S A*. 1996; 93:6886–6891.
36. Zhang H, Fraser ST, Papazoglu C, Hoatlin ME, Baron MH. Transcriptional activation by the Mix11 homeodomain protein in differentiating mouse embryonic stem cells. *Stem Cells*. 2009; 27:2884–2895.
37. Pereira LA, Wong MS, Mossman AK, Sourris K, Janes ME, Knezevic K, Hirst CE, Lim SM, Pimanda JE, Stanley EG, Elefanty AG. Pdgfralpha and Flk1 are direct target genes of Mix11 in differentiating embryonic stem cells. *Stem Cell Res*. 2012; 8:165–179.
38. Bailey TL, Elkan C. Fitting a mixture model by expectation maximization to discover motifs in biopolymers. *Proc Int Conf Intell Syst Mol Biol*. 1994; 2:28–36.
39. Gilmore TD, Kalaitzidis D, Liang MC, Starczynowski DT. The c-Rel transcription factor and B-cell proliferation: a deal with the devil. *Oncogene*. 2004; 23:2275–2286.
40. Hromas R, Davis B, Rauscher FJ, Klemsz M, Tenen D, Hoffman S, Xu D, Morris JF. Hematopoietic transcriptional regulation by the myeloid zinc finger gene, MZF-1. *Curr Top Microbiol Immunol*. 1996; 211:159–164.
41. Golub TR, Slonim DK, Tamayo P, Huard C, Gaasenbeek M, Mesirov JP, Coller H, Loh ML, Downing JR, Caligiuri MA, Bloomfield CD, Lander ES. Molecular classification of cancer: class discovery, class prediction by gene expression monitoring. *Science*. 1999; 286:531–537.
42. Lawrence HJ, Rozenfeld S, Cruz C, Matsukuma K, Kwong A, Komuves L, Buchberg AM, Largman C. Frequent co-expression of the HOXA9 and MEIS1 homeobox genes in human myeloid leukemias. *Leukemia*. 1999; 13:1993–1999.
43. Cerami E, Gao J, Dogrusoz U, Gross BE, Sumer SO, Aksoy BA, Jacobsen A, Byrne CJ, Heuer ML, Larsson E, Antipin Y, Reva B, Goldberg AP, Sander C, Schultz N. The cBio cancer genomics portal: an open platform for exploring multidimensional cancer genomics data. *Cancer Discov*. 2012; 2:401–404.
44. Nakamura T, Largaespada DA, Shaughnessy JD, Jr., Jenkins NA, Copeland NG. Cooperative activation of Hoxa and Pbx1-related genes in murine myeloid leukaemias. *Nat Genet*. 1996; 12:149–153.
45. Kroon E, Kros J, Thorsteinsdottir U, Baban S, Buchberg AM, Sauvageau G. Hoxa9 transforms primary bone marrow cells through specific collaboration with Meis1a but not Pbx1b. *Embo J*. 1998; 17:3714–3725.
46. Wang GG, Pasillas MP, Kamps MP. Persistent transactivation by meis1 replaces hox function in myeloid leukemogenesis models: evidence for co-occupancy of meis1-pbx and hox-pbx complexes on promoters of leukemia-associated genes. *Molecular and cellular biology*. 2006; 26:3902–3916.
47. Mullighan CG, Kennedy A, Zhou X, Radtke I, Phillips LA, Shurtleff SA, Downing JR. Pediatric acute myeloid leukemia with NPM1 mutations is characterized by a gene expression profile with dysregulated HOX gene expression distinct from MLL-rearranged leukemias. *Leukemia*. 2007; 21:2000–2009.
48. Vassiliou GS, Cooper JL, Rad R, Li J, Rice S, Uren A, Rad L, Ellis P, Andrews R, Banerjee R, Grove C, Wang W, Liu P, Wright P, Arends M, Bradley A. Mutant nucleophosmin and cooperating pathways drive leukemia initiation and progression in mice. *Nat Genet*. 2011; 43:470–475.
49. Yu PB, Deng DY, Lai CS, Hong CC, Cuny GD, Bouxsein ML, Hong DW, McManus PM, Katagiri T, Sachidanandan C, Kamiya N, Fukuda T, Mishina Y, Peterson RT, Bloch KD. BMP type I receptor inhibition reduces heterotopic [corrected] ossification. *Nat Med*. 2008; 14:1363–1369.
50. Sanvitale CE, Kerr G, Chaikuad A, Ramel MC, Mohedas AH, Reichert S, Wang Y, Triffitt JT, Cuny GD,

- Yu PB, Hill CS, Bullock AN. A new class of small molecule inhibitor of BMP signaling. *PLoS One*. 2013; 8:e62721.
51. Chen C, Edelstein LC, Gelinas C. The Rel/NF-kappaB family directly activates expression of the apoptosis inhibitor Bcl-x(L). *Molecular and cellular biology*. 2000; 20:2687–2695.
  52. Gilmore TD, Gerondakis S. The c-Rel Transcription Factor in Development and Disease. *Genes & cancer*. 2011; 2:695–711.
  53. Zhao C, Xiu Y, Ashton J, Xing L, Morita Y, Jordan CT, Boyce BF. Noncanonical NF- $\kappa$ B signaling regulates hematopoietic stem cell self-renewal and microenvironment interactions. *Stem Cells*. 2012; 30:709–718.
  54. Bogenberger JM, Kornblau SM, Pierceall WE, Lena R, Chow D, Shi CX, Mantei J, Ahmann G, Gonzales IM, Choudhary A, Valdez R, Camoriano J, Fauble V, Tiedemann RE, Qiu YH, Coombes KR, et al. BCL-2 family proteins as 5-Azacytidine-sensitizing targets and determinants of response in myeloid malignancies. *Leukemia*. 2014; 28:1657–1665.
  55. Metais JY, Winkler T, Geyer JT, Calado RT, Aplan PD, Eckhaus MA, Dunbar CE. BCL2A1a over-expression in murine hematopoietic stem and progenitor cells decreases apoptosis and results in hematopoietic transformation. *PLoS One*. 2012; 7:e48267.
  56. Pereira LA, Wong MS, Lim SM, Sides A, Stanley EG, Elefanty AG. Brachyury and related Tbx proteins interact with the Mixl1 homeodomain protein and negatively regulate Mixl1 transcriptional activity. *PLoS One*. 2011; 6:e28394.
  57. Ravasi T, Suzuki H, Cannistraci CV, Katayama S, Bajic VB, Tan K, Akalin A, Schmeier S, Kanamori-Katayama M, Bertin N, Carninci P, Daub CO, Forrest AR, Gough J, Grimmond S, Han JH, et al. An atlas of combinatorial transcriptional regulation in mouse and man. *Cell*. 2010; 140:744–752.
  58. Garg V, Kathiriya IS, Barnes R, Schluterman MK, King IN, Butler CA, Rothrock CR, Eapen RS, Hirayama-Yamada K, Joo K, Matsuoka R, Cohen JC, Srivastava D. GATA4 mutations cause human congenital heart defects and reveal an interaction with TBX5. *Nature*. 2003; 424:443–447.
  59. Andreeff M, Ruvalo V, Gadgil S, Zeng C, Coombes K, Chen W, Kornblau S, Barón AE, Drabkin HA. HOX expression patterns identify a common signature for favorable AML. *Leukemia*. 2008; 22:2041–2047.
  60. Coenen EA, Zwaan CM, Reinhardt D, Harrison CJ, Haas OA, de Haas V, Mihal V, De Moerloose B, Jeison M, Rubnitz JE, Tomizawa D, Johnston D, Alonzo TA, Hasle H, Auvrignon A, Dworzak M, et al. Pediatric acute myeloid leukemia with t(8;16)(p11;p13), a distinct clinical and biological entity: a collaborative study by the International-Berlin-Frankfurt-Munster AML-study group. *Blood*. 2013; 122:2704–2713.
  61. Haferlach C, Haferlach T. Another piece of the AML puzzle. *Blood*. 2013; 122:2532–2534.
  62. Silliman CC, McGavran L, Wei Q, Miller LA, Li S, Hunger SP. Alternative splicing in wild-type AF10 and CALM cDNAs and in AF10-CALM and CALM-AF10 fusion cDNAs produced by the t(10;11)(p13-14;q14-q21) suggests a potential role for truncated AF10 polypeptides. *Leukemia*. 1998; 12:1404–1410.
  63. Gu TL, Goss VL, Reeves C, Popova L, Nardone J, Macneill J, Walters DK, Wang Y, Rush J, Comb MJ, Druker BJ, Polakiewicz RD. Phosphotyrosine profiling identifies the KG-1 cell line as a model for the study of FGFR1 fusions in acute myeloid leukemia. *Blood*. 2006; 108:4202–4204.
  64. Caudell D, Zhang Z, Chung YJ, Aplan PD. Expression of a CALM-AF10 fusion gene leads to Hoxa cluster overexpression and acute leukemia in transgenic mice. *Cancer Res*. 2007; 67:8022–8031.
  65. Mizutani A, Koinuma D, Tsutsumi S, Kamimura N, Morikawa M, Suzuki HI, Imamura T, Miyazono K, Aburatani H. Cell type-specific target selection by combinatorial binding of Smad2/3 proteins and hepatocyte nuclear factor 4alpha in HepG2 cells. *J Biol Chem*. 2011; 286:29848–29860.
  66. Bhatia M, Bonnet D, Wu D, Murdoch B, Wrana J, Gallacher L, Dick JE. Bone morphogenetic proteins regulate the developmental program of human hematopoietic stem cells. *The Journal of experimental medicine*. 1999; 189:1139–1148.
  67. Hutton JF, Rozenkov V, Khor FS, D'Andrea RJ, Lewis ID. Bone morphogenetic protein 4 contributes to the maintenance of primitive cord blood hematopoietic progenitors in an *ex vivo* stroma-noncontact co-culture system. *Stem cells and development*. 2006; 15:805–813.
  68. Khurana S, Buckley S, Schouteden S, Ekker S, Petryk A, Delforge M, Zwijsen A, Verfaillie CM. A novel role of BMP4 in adult hematopoietic stem and progenitor cell homing via Smad independent regulation of integrin-alpha4 expression. *Blood*. 2013; 121:781–790.
  69. Laperrousaz B, Jeanpierre S, Sagorny K, Voeltzel T, Ramas S, Kaniewski B, Ffrench M, Salesse S, Nicolini FE, Maguer-Satta V. Primitive CML cell expansion relies on abnormal levels of BMPs provided by the niche and on BMPRIb overexpression. *Blood*. 2013; 122:3767–3777.
  70. Gruber TA, Larson Gedman A, Zhang J, Koss CS, Marada S, Ta HQ, Chen SC, Su X, Ogden SK, Dang J, Wu G, Gupta V, Andersson AK, Pounds S, Shi L, Easton J, et al. An Inv(16)(p13.3q24.3)-encoded CBFA2T3-GLIS2 fusion protein defines an aggressive subtype of pediatric acute megakaryoblastic leukemia. *Cancer Cell*. 2012; 22:683–697.
  71. Trompouki E, Bowman TV, Lawton LN, Fan ZP, Wu DC, DiBiase A, Martin CS, Cech JN, Sessa AK, Leblanc JL, Li P, Durand EM, Mosimann C, Heffner GC, Daley GQ, Paulson RF, et al. Lineage regulators direct BMP and Wnt pathways to cell-specific programs during differentiation and regeneration. *Cell*. 2011; 147:577–589.

72. Fotinos A, Nagarajan N, Martins AS, Fritz DT, Garsetti D, Lee AT, Hong CC, Rogers MB. Bone morphogenetic protein-focused strategies to induce cytotoxicity in lung cancer cells. *Anticancer research*. 2014; 34:2095–2104.
73. Boergermann JH, Kopf J, Yu PB, Knaus P. Dorsomorphin and LDN-193189 inhibit BMP-mediated Smad, p38 and Akt signalling in C2C12 cells. *The international journal of biochemistry & cell biology*. 2010; 42:1802–1807.
74. Steinbicker AU, Sachidanandan C, Vonner AJ, Yusuf RZ, Deng DY, Lai CS, Rauwerdink KM, Winn JC, Saez B, Cook CM, Szekely BA, Roy CN, Seehra JS, Cuny GD, Scadden DT, Peterson RT, et al. Inhibition of bone morphogenetic protein signaling attenuates anemia associated with inflammation. *Blood*. 2011; 117:4915–4923.
75. Cuny GD, Yu PB, Laha JK, Xing X, Liu JF, Lai CS, Deng DY, Sachidanandan C, Bloch KD, Peterson RT. Structure-activity relationship study of bone morphogenetic protein (BMP) signaling inhibitors. *Bioorg Med Chem Lett*. 2008; 18:4388–4392.
76. Vogt J, Traynor R, Sapkota GP. The specificities of small molecule inhibitors of the TGF $\beta$ s and BMP pathways. *Cell Signal*. 2011; 23:1831–1842.
77. Iancu-Rubin C, Mosoyan G, Wang J, Kraus T, Sung V, Hoffman R. Stromal cell-mediated inhibition of erythropoiesis can be attenuated by Sotatercept (ACE-011), an activin receptor type II ligand trap. *Exp Hematol*. 2013; 41:155–166 e117.
78. Fields SZ, Parshad S, Anne M, Raftopoulos H, Alexander MJ, Sherman ML, Laadem A, Sung V, Terpos E. Activin receptor antagonists for cancer-related anemia and bone disease. *Expert Opin Investig Drugs*. 2013; 22:87–101.
79. Hu Q, Maity SN. Stable expression of a dominant negative mutant of CCAAT binding factor/NF-Y in mouse fibroblast cells resulting in retardation of cell growth and inhibition of transcription of various cellular genes. *J Biol Chem*. 2000; 275:4435–4444.
80. Liang H, Samanta S, Nagarajan L. SSBP2, a candidate tumor suppressor gene, induces growth arrest and differentiation of myeloid leukemia cells. *Oncogene*. 2005; 24:2625–2634.
81. Sergeeva A, Alatrash G, He H, Ruisaard K, Lu S, Wygant J, McIntyre BW, Ma Q, Li D, St John L, Clise-Dwyer K, Molldrem JJ. An anti-PR1/HLA-A2 T-cell receptor-like antibody mediates complement-dependent cytotoxicity against acute myeloid leukemia progenitor cells. *Blood*. 2011; 117:4262–4272.
82. Alfa RW, Blesch A. Murine and HIV-based retroviral vectors for *in vitro* and *in vivo* gene transfer. *Methods in molecular medicine*. 2006; 129:241–254.
83. Chadee DN, Hendzel MJ, Tylopski CP, Allis CD, Bazett-Jones DP, Wright JA, Davie JR. Increased Ser-10 phosphorylation of histone H3 in mitogen-stimulated and oncogene-transformed mouse fibroblasts. *J Biol Chem*. 1999; 274:24914–24920.
84. Zhang Y, Liu T, Meyer CA, Eeckhoute J, Johnson DS, Bernstein BE, Nusbaum C, Myers RM, Brown M, Li W, Liu XS. Model-based analysis of ChIP-Seq (MACS). *Genome Biol*. 2008; 9:R137.
85. Bailey TL, Gribskov M. Methods and statistics for combining motif match scores. *J Comput Biol*. 1998; 5:211–221.
86. Li C, Wong WH. Model-based analysis of oligonucleotide arrays: expression index computation and outlier detection. *Proc Natl Acad Sci U S A*. 2001; 98:31–36.
87. Ashburner M, Ball CA, Blake JA, Botstein D, Butler H, Cherry JM, Davis AP, Dolinski K, Dwight SS, Eppig JT, Harris MA, Hill DP, Issel-Tarver L, Kasarskis A, Lewis S, Matese JC, et al. Gene ontology: tool for the unification of biology. The Gene Ontology Consortium. *Nat Genet*. 2000; 25:25–29.
88. Bolstad BM, Irizarry RA, Astrand M, Speed TP. A comparison of normalization methods for high density oligonucleotide array data based on variance and bias. *Bioinformatics*. 2003; 19:185–193.
89. Gao J, Aksoy BA, Dogrusoz U, Dresdner G, Gross B, Sumer SO, Sun Y, Jacobsen A, Sinha R, Larsson E, Cerami E, Sander C, Schultz N. Integrative analysis of complex cancer genomics and clinical profiles using the cBioPortal. *Sci Signal*. 2013; 6:p11.
90. Kaplan E, Meier P. (1958). Nonparametric estimation from incomplete observations. (*Journal of the American Statistical Association*, pp. 457–481.
91. Akiyama Y. (1995). TFSEARCH: Searching Transcription Factor Binding Sites.
